1 **Spatially displaced excitation contributes to the encoding of interrupted motion**  
2 **by the retinal direction-selective circuit**

3  
4 Jennifer Ding<sup>1,2</sup>, Albert Chen<sup>3</sup>, Janet Chung<sup>2</sup>, Hector Acaron Ledesma<sup>4</sup>, Mofei Wu<sup>2</sup>,  
5 David M. Berson<sup>5</sup>, Stephanie E. Palmer<sup>1,3,6\*</sup>, Wei Wei<sup>1,2,6\*</sup>

- 6  
7 1. Committee on Neurobiology Graduate Program, The University of Chicago  
8 2. Department of Neurobiology, The University of Chicago  
9 3. Department of Organismal Biology, The University of Chicago  
10 4. Graduate Program in Biophysical Sciences, The University of Chicago  
11 5. Department of Neuroscience and Carney Institute for Brain Science, Brown  
12 University  
13 6. Grossman Institute for Neuroscience, Quantitative Biology and Human  
14 Behavior, The University of Chicago

15 \*Co-corresponding authors: [weiw@uchicago.edu](mailto:weiw@uchicago.edu); [sepalmer@uchicago.edu](mailto:sepalmer@uchicago.edu)

16  
17  
18 **Abstract**

19  
20 Spatially distributed excitation and inhibition collectively shape a visual neuron's  
21 receptive field (RF) properties. In the direction-selective circuit of the mammalian retina,  
22 the role of strong null-direction inhibition of On-Off direction-selective ganglion cells  
23 (ON-OFF DSGCs) on their direction selectivity is well-studied. However, how excitatory  
24 inputs influence the On-Off DSGC's visual response is underexplored. Here, we report  
25 that On-Off DSGCs have a spatially displaced glutamatergic receptive field along their  
26 preferred-null motion axis. This displaced receptive field contributes to DSGC null-  
27 direction spiking during interrupted motion trajectories. Theoretical analyses indicate  
28 that population responses during interrupted motion may help populations of On-Off  
29 DSGCs signal the spatial location of moving objects in complex, naturalistic visual  
30 environments. Our study highlights that the direction-selective circuit exploits separate  
31 sets of mechanisms under different stimulus conditions, and these mechanisms may  
32 help encode multiple visual features.

## 42 Introduction

43

44 How do sensory systems convert sensory inputs into behaviorally relevant neural  
45 signals? This question has been extensively investigated in the early visual system,  
46 where a neuron's responses to a set of parameterizable visual stimuli can be  
47 systematically probed to reveal a cell's receptive field (RF) properties in space and time.  
48 It has been increasingly appreciated that different visual stimuli can engage different  
49 mechanisms to shape the neuronal RF even at the earliest stage of visual processing in  
50 the retina. The transformation from the visual input to a retinal ganglion cell's spiking  
51 output is influenced by spatiotemporal patterns of stimuli in both the RF center and  
52 surround regions, highlighting the necessity of using diverse, ethologically relevant  
53 visual stimuli for delineating RF properties and for ultimately understanding neural  
54 coding of the animal's natural environment (Chiao and Masland, 2003; Demb et al.,  
55 1999; Deny et al., 2017; Huang et al., 2019; Ölveczky et al., 2003; Takeshita and  
56 Gollisch, 2014; Turner et al., 2018).

57

58 Direction-selective ganglion cells (DSGCs) in the mammalian retina are well-  
59 studied for their motion direction selectivity. A DSGC fires maximally to visual stimuli  
60 moving across its RF in its preferred direction and is inhibited from firing by stimuli  
61 moving in the opposite, null direction (Barlow and Hill, 1963; Barlow and Levick, 1965).  
62 The direction-selective spiking is largely attributed to the GABAergic input from the  
63 starburst amacrine cell (SAC). SAC dendrites are inherently direction-selective, as they  
64 are activated by centrifugal motion, or motion from soma to dendritic tip (Euler et al.,  
65 2002). Additionally, only SAC dendrites that extend along the null direction of the DSGC  
66 selectively make GABAergic synapses with the DSGC (Briggman et al., 2011; Fried et  
67 al., 2002; Lee and Zhou, 2010; Wei et al., 2011; Yonehara et al., 2011). Both the  
68 intrinsic properties of the SAC and the 'antiparallel' wiring patterns between the SAC  
69 and the DSGC are necessary for a strong null-direction inhibition onto the DSGC. The  
70 asymmetry of inhibition evoked by motion in the preferred and null directions is  
71 important for the DSGC's direction selectivity (Pei et al., 2015; Taylor and Vaney, 2002).  
72 The most well-studied DSGC type, the On-Off DSGC, prefers motion in one of the four  
73 cardinal directions (Oyster and Barlow, 1967; Sabbah et al., 2017). They have  
74 bistratified dendritic arbors in the On and Off sublamina of the inner plexiform layer (IPL)  
75 to extract motion directions of bright and dark signals, respectively (**Figure 1A**)  
76 (Famiglietti 1983; He and Masland, 1998; Kittila and Massey, 1997).

77

78 The RF of On-Off DSGCs has been studied with conventional visual stimuli such  
79 as stationary and moving spots, bars, and gratings. For motion stimuli that traverse  
80 across the entire RF, On-Off DSGC responses remain direction-selective over a broad  
81 range of contrast, luminance, speed, and background noise levels (Barlow and Levick,  
82 1965; Chen et al., 2016; Grzywacz and Amthor, 2007; Lipin et al., 2015;

83 Sethuramanujam et al., 2016; Sivyer et al., 2010). However, motion stimuli restricted to  
84 the distal RF subregion on the preferred side (defined as the side from which the  
85 preferred-direction moving stimulus approaches the RF) can elicit non-directional firing  
86 (He et al., 1999; He and Masland, 1998; Rivlin-Etzion et al., 2011; Trenholm et al.,  
87 2011). Based on the responses to moving stimuli presented to different subregions of  
88 the DSGC RF, the cell's RF structure can be viewed as consisting of multiple 'DS  
89 subunits' and a 'non-DS zone' at the edge of the preferred side. However, the neural  
90 mechanisms underlying the modular and heterogenous RF subunits of On-Off DSGCs  
91 have not been elucidated. Furthermore, the functional significance of this fine RF  
92 structure is not clear.

93  
94 In this study, we investigated the spatial RF structure of the mouse On-Off DSGC  
95 subtype that prefers motion in the posterior direction of the visual field (pDSGC). We  
96 found that the pDSGC spiking RF is skewed towards the preferred side of the cell for  
97 both stationary and moving stimuli, even in the absence of SAC-mediated inhibition.  
98 Combining anatomical and functional analyses, we found a spatially non-uniform  
99 glutamatergic excitatory conductance that contributes to this spatial displacement. As a  
100 result of the displaced RF, moving stimuli that only activate the preferred side of the  
101 pDSGC RF trigger robust firing during both preferred and null direction motion.  
102 Theoretical analyses of the On-Off DSGC population response allow us to speculate  
103 about the ethological relevance of the displaced RF in processing complex natural  
104 scenes, suggesting that it can allow for better estimation of object location when a  
105 moving object emerges from behind an occluder. We term this type of motion  
106 'interrupted motion' to distinguish it from more standard smooth motion stimuli. This  
107 phenomenon might also allow synchronous firing from different subtypes of DSGCs to  
108 serve as a useful alarm signal in complex scenes.

## 109 **Results**

110

### 111 **Glutamatergic excitation of the On-Off pDSGC is spatially asymmetric relative to** 112 **the soma**

113

114 To investigate the spatial distribution of excitatory inputs to On-Off pDSGCs, we  
115 targeted pDSGCs in the *Drd4*-GFP transgenic mouse line. Bright stationary spots were  
116 presented to the periphery of the DSCF RF and the spiking responses were recorded.  
117 These spots were 110  $\mu\text{m}$  in diameter and centered 165  $\mu\text{m}$  from the soma of the  
118 recorded DSGC (**Figure 1B**, schematic). Measurement of the average radius of pDSGC  
119 On and Off dendrites (On: 88.1, STDEV 13.9  $\mu\text{m}$ , Off: 75.9, STDEV 13.7  $\mu\text{m}$ , from 25  
120 cells, see Methods) indicates that the spot mostly covered areas beyond the dendritic  
121 span of these cells. For each cell tested, we also presented a moving bar stimulus to  
122 confirm its directional tuning to posterior-direction motion in the visual field.

123 The spot stimulus delivered to the pDSGC RF periphery uncovered an  
 124 asymmetric RF organization where some spots evoked maximal spiking (Max) and  
 125 other spots presented to the opposite regions (Opp) across the dendritic span evoked  
 126 minimal responses (**Figures 1B, 1C, S1A, and S1B**). The Max-Opp axis largely  
 127 corresponds with the preferred-null motion axis, which is shown by the polar plots in  
 128 Figure 1 where the preferred side is aligned to the top. The preferred side is the side  
 129 where the preferred direction of motion originates. The majority of the maximum  
 130 responses to the peripheral spots occurs within 67.5 degrees from the preferred  
 131 direction of the DSGC and half occur within 22.5 degrees of the preferred  
 132 direction (**Figures 1B, 1C “Control”, and S1A**).

133  
 134

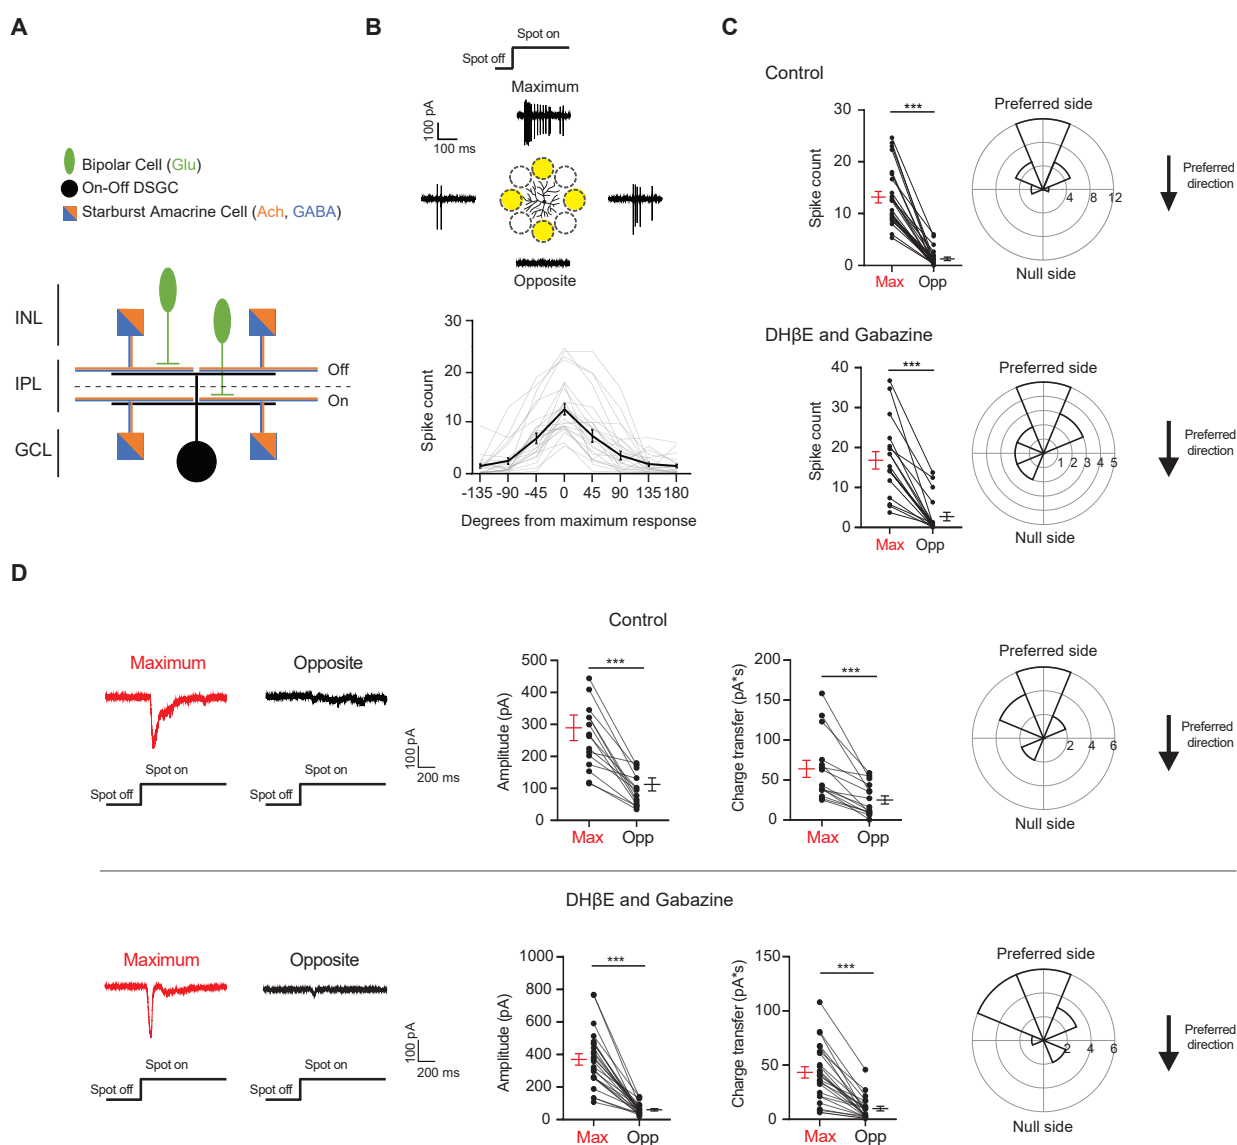

135  
 136

137 **Figure 1. Drd4-GFP labeled pDSGCs have spatially asymmetric glutamatergic receptive**  
138 **fields.**

139 **(A)** Schematic showing types of presynaptic neurons to an On-Off DSGC and the  
140 neurotransmitters they use. **(B)** Top: Example On spiking responses of a pDSGC to four different  
141 peripheral spots presented around dendritic span. Bottom: Individual (gray) and mean (black)  
142 pDSGC On spike counts evoked by spots presented at different locations (25 cells). **(C)** Top left:  
143 Pairwise comparison of mean spike counts in regions evoking the maximum number of On spikes  
144 (Max) and the opposite region (Opp) in the control condition (25 cells). Top right: Polar histogram  
145 of Max region locations aligned to the preferred-null motion axis. Radius indicates number of cells.  
146 Bottom: Same as in top but experiments performed in DH $\beta$ E + Gabazine (18 cells). **(D)** Left:  
147 Example On EPSC responses to spots shown in the regions evoking the strongest EPSCs (Max)  
148 and the opposite region (Opp) in control (top) and in DH $\beta$ E + Gabazine (bottom). Middle: Pairwise  
149 comparisons of EPSC amplitude and charge transfer to spots presented in the Max region and  
150 Opp region (Control: 15 cells; DH $\beta$ E + Gabazine: 24 cells). Right: Polar histograms of Max region  
151 locations determined by EPSC charge transfer aligned to the preferred-null motion axis. Radius  
152 indicates number of cells. Summary statistics are mean  $\pm$  SEM, \*\*\*p < 0.001.

153

154 Because a well-documented asymmetry in the direction-selective circuit is the  
155 asymmetric inhibition from SACs to DSGCs, we next tested whether the displacement  
156 of the pDSGC spiking RF is eliminated by blocking SAC inputs. We perfused the retina  
157 with the nicotinic antagonist DH $\beta$ E and the GABA<sub>A</sub> receptor antagonist gabazine to  
158 block these inputs. Under this condition, we still observed a spatial asymmetry in  
159 pDSGC spiking activity evoked by the flashing spots (**Figures 1C, S1A and S1B**,  
160 “DH $\beta$ E and Gabazine”), indicating a spatial displacement of glutamatergic excitation of  
161 the pDSGC in the absence of SAC influence.

162

163 To directly measure the strength of excitatory inputs to pDSGCs at different  
164 stimulus locations, we performed whole-cell voltage clamp recordings of excitatory  
165 postsynaptic currents (EPSCs) evoked by peripheral flashing spots. Consistent with the  
166 pattern of pDSGC spiking activity, spot-evoked EPSCs show a spatial bias towards the  
167 preferred side (**Figures 1D, S1C and S1F**, “Control”). Isolation of the glutamatergic  
168 component of the EPSC by the addition of DH $\beta$ E and gabazine confirms the persistence  
169 of the spatial asymmetry, indicating that the glutamatergic excitation of the pDSGC is  
170 not isotropic but is spatially displaced relative to the soma (**Figures 1D and S1C – G**,  
171 “DH $\beta$ E and Gabazine”). We noted that gabazine and DH $\beta$ E reduced the rise and decay  
172 time of the EPSC waveform compared to that in the control condition (**Figure S1E**),  
173 presumably due to the removal of the cholinergic component of the EPSC. Ablating the  
174 GABAergic contribution pharmacologically also rules out the possibility that a strong  
175 null-direction GABAergic inhibition is contaminating and artificially reducing the EPSCs  
176 on the null side, which is a potential confound during voltage clamp recordings due to  
177 imperfect control of membrane potential in distal dendrites (Poleg-Polsky and Diamond,  
178 2011).

179 **Non-uniform excitatory conductance across the preferred-null motion axis**  
180 **contributes to the asymmetric glutamatergic RF**

181  
182 An asymmetric excitatory RF in a retinal neuron may result from asymmetric  
183 dendritic arbors and/or an asymmetric distribution of excitatory synaptic inputs across its  
184 dendritic field. We performed two-photon imaging of dye-filled dendritic arbors after  
185 recording glutamatergic EPSCs evoked by the peripheral flashing spot stimulus  
186 described above (**Figures 2A and 2B**). Consistent with previous studies, dendritic  
187 arbors of pDSGCs do not exhibit a salient or consistent bias relative to the cell's  
188 preferred motion direction. The total dendritic length or the number of dendritic  
189

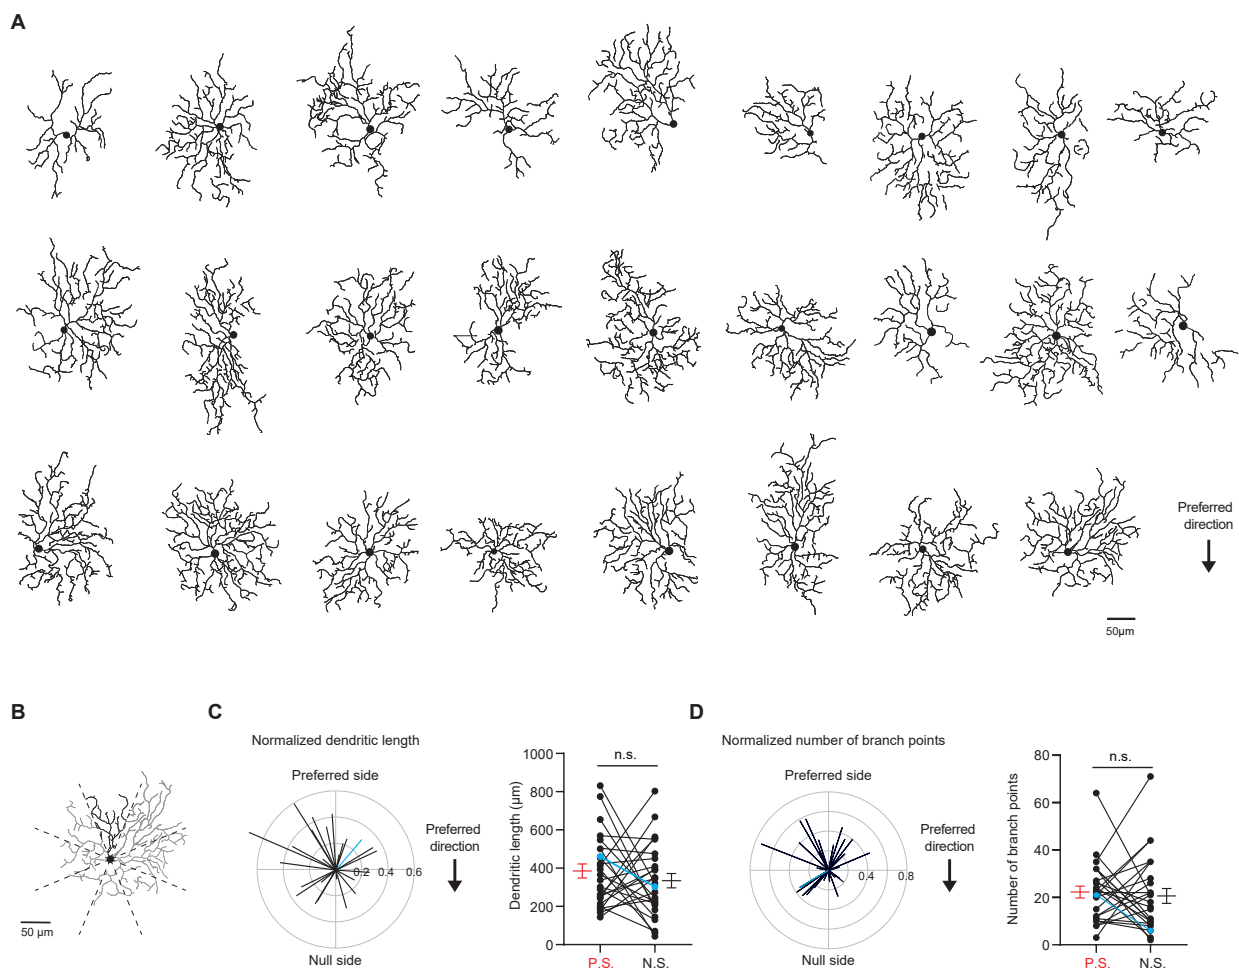

190  
191  
192 **Figure 2. pDSGC dendritic morphology does not show a spatial bias towards the preferred**  
193 **side.**  
194 **(A)** Traced On layer dendritic morphologies of pDSGCs aligned to their preferred-direction motion.  
195 **(B)** Example On morphology of a pDSGC cell divided into eight sectors for calculating normalized  
196 dendritic length vector. **(C)** Left: Normalized vector sum of On dendritic length aligned to pDSGCs'  
197 preferred direction motion. Right: Pairwise comparison of dendritic length on the preferred vs null



198 sides of each cell (26 cells,  $p = 0.51$ ). Blue represents example cell in **B**. **(D)** Left: Normalized  
199 vector sum of On branch points aligned to pDSGCs' preferred direction motion. Right: Pairwise  
200 comparison of branch points on the preferred vs null side (26 cells,  $p = 0.68$ ). Blue represents  
201 example cell in **B**. Summary statistics are mean  $\pm$  SEM.  
202

203 branching points does not significantly differ between the preferred and null sides of the  
204 pDSGC dendritic field (**Figures 2C, 2D and S2A – C**). This apparent randomness of  
205 dendritic arbor distribution relative to the cell's preferred motion direction contrasts with  
206 the previously reported mouse On-Off DSGC subtype preferring motion in the superior  
207 direction that have dendritic arbors strongly displaced to the null side of the soma (El-  
208 Quessny et al., 2020; Kay et al., 2011; Trenholm et al., 2011).  
209

210 The preferred motion direction of the pDSGC spiking activity is shaped by the  
211 interaction of its excitatory and inhibitory inputs. Next, we examined the relationship  
212 between pDSGC dendritic morphology and its glutamatergic inputs. We found a non-  
213 random skew of the pDSGC dendritic length and number of branch points towards the  
214 regions corresponding to spots evoking the strongest glutamatergic EPSCs (**Figure**  
215 **S2D and S2E**). However, the extent of the dendritic bias is not correlated with the  
216 extent of the bias in EPSC strength (**Figure S2F**), suggesting that dendritic arbor  
217 density alone cannot fully explain the displacement of the pDSGC glutamatergic RF.  
218

219 To further explore the relationship between the pDSGC glutamatergic RF and its  
220 dendritic distribution, we performed another set of experiments to obtain a more  
221 complete RF map. First, the preferred direction of each cell's spiking activity was  
222 determined by loose cell-attached recordings using a moving bar stimulus with no  
223 synaptic blockers. Next, peripheral flashing spots were used to estimate the spatial  
224 displacement of the pDSGC glutamatergic RF in the presence of nicotinic and  
225 GABAergic receptor antagonists (DH $\beta$ E + Gabazine) as described above. Then, a  
226 smaller, 20  $\mu$ m diameter bright stationary spot was repeatedly flashed at random  
227 locations within a 11-by-11 220  $\mu$ m square grid centered on the pDSGC soma. A  
228 heatmap of glutamatergic EPSC charge transfer evoked by the small flashing spot was  
229 generated and overlaid with the reconstructed dendritic arbors for each pDSGC (**Figure**  
230 **3A**).  
231

232 RF mapping with small flashing spots revealed a spatial displacement of  
233 glutamatergic EPSC distribution that aligns well with the displacement determined by  
234 larger spots presented to the pDSGC periphery (**Figure 3B**). Similar to the  
235 displacement pattern revealed by stimulation of the RF periphery, the strongest  
236 glutamatergic EPSCs are preferentially located on the preferred side of pDSGC somas  
237 (**Figure 3C**). Notably, for most cells, the center of the glutamatergic EPSC RF is  
238 displaced from the center of the dendritic field (**Figure S3A and S3B**), indicating

239 additional mechanisms underlying the glutamatergic RF displacement apart from the  
 240 dendritic arbor distribution.

241  
 242 We further examined the strength of the glutamatergic input across the pDSGC  
 243 dendritic field (**Figure 3D**). We normalized the EPSC charge transfer by the total  
 244

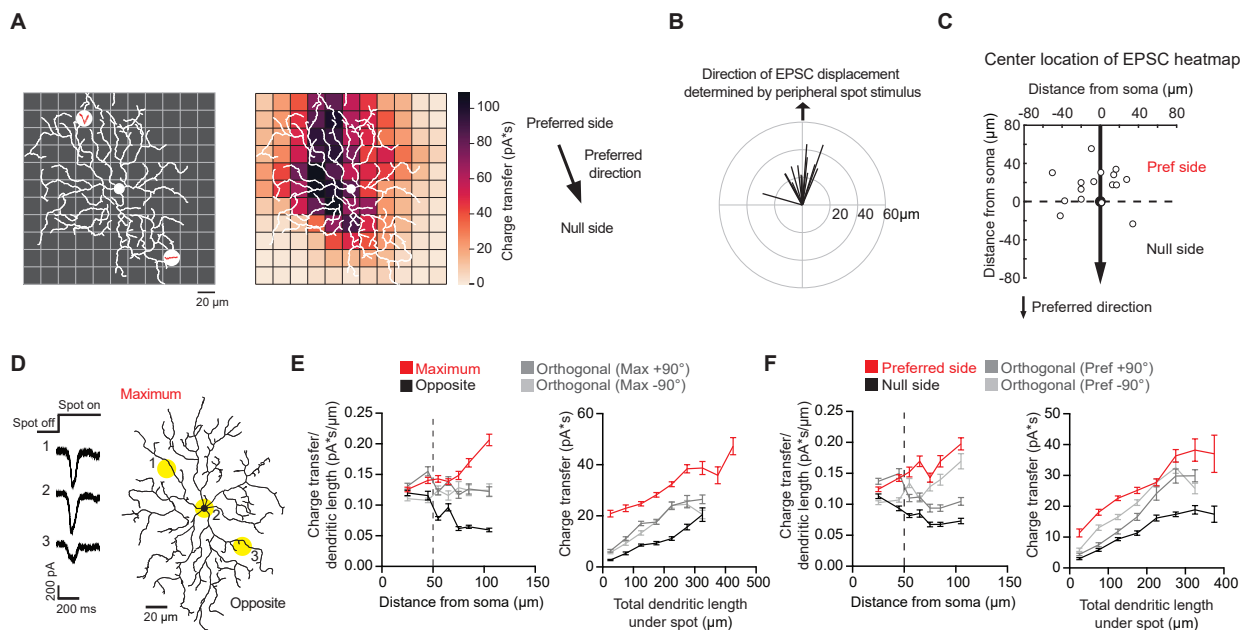

245  
 246  
 247 **Figure 3. Non-uniform glutamatergic synaptic excitation across pDSGC dendritic span**  
 248 **contributes to skewed excitatory receptive field.**  
 249 **(A)** Left: Schematic for small spot RF mapping experiment in DH $\beta$ E + Gabazine. Middle: Example  
 250 heat map. Right: Preferred motion direction of the example cell in relation to the preferred side  
 251 and the null side of the cell's RF. **(B)** Vector sum plot of On EPSC charge transfer center of mass  
 252 determined by small spot RF mapping aligned to the region where a peripheral spot evokes the  
 253 maximum glutamatergic EPSC (upward arrow). **(C)** Spatial locations showing centers of mass of  
 254 glutamatergic excitatory On charge transfer obtained from experiments illustrated in **A** aligned to  
 255 each cell's preferred motion direction (15 cells). **(D)** Example On EPSC responses to spots  
 256 presented to a pDSGC along the maximum-opposite axis of glutamatergic RF displacement. **(E)**  
 257 Left: On "EPSC current density" (i.e. ratio of charge transfer per dendritic length) versus distance  
 258 from soma along the maximum-opposite axis of glutamatergic RF displacement (16 cells, \*\*\* $p <$   
 259  $0.001$ ) as well as along the orthogonal axis. Right: Summary plot of glutamatergic charge transfer  
 260 as a function of total dendritic length centered around the flashing spot for spots shown more than  
 261 50  $\mu\text{m}$  away from the soma (16 cells, \*\*\* $p < 0.001$ ). **(F)** Same as **E** but along the preferred-null  
 262 motion axis (15 cells, charge transfer/dendritic length vs distance from soma \*\* $p = 0.0026$ , charge  
 263 transfer vs dendritic length \*\*\* $p < 0.001$ ). Summary statistics are mean  $\pm$  SEM.

264  
 265  
 266



267 dendritic length in a circle with a 60  $\mu\text{m}$  diameter centered on each small flashing spot.  
268 This provides an estimate of the strength of glutamatergic inputs per unit dendritic  
269 length, or “EPSC density”, at each stimulus location. When we calculated the density  
270 along the axis of maximal glutamatergic RF displacement, we found that the EPSC  
271 density on the displaced side of the dendritic field is larger than the corresponding  
272 region on the opposite side (**Figures 3E**, left, and **S3E**). From 50  $\mu\text{m}$  away from the  
273 soma, spots on the side corresponding to the maximum displacement (Maximum) yield  
274 stronger EPSCs than spots on the opposite side (Opposite), while controlling for the  
275 same dendritic length (**Figures 3E**, right, and **S3E**). This heterogeneity in EPSC density  
276 across the dendritic span persists when comparing EPSC responses along the  
277 preferred-direction motion axis of the cell (**Figures 3F** and **S3F**). Analysis of the peak  
278 amplitudes showed similar results as charge transfer (**Figures S3C** and **S3D**).  
279

280 Next, we asked what mechanisms could underlie the non-uniform excitatory  
281 conductance across the dendritic span. Because bipolar cells provide the dominant  
282 excitatory input to DSGCs, the enhanced excitation on the preferred side of the  
283 receptive field could stem from increased density or strength of bipolar synapses. Using  
284 a published serial block-face scanning electron microscopic (SBEM) dataset of the adult  
285 mouse retina (Ding et al., 2016), we reconstructed large numbers of ON starburst  
286 amacrine cells and On-OFF DSGCs (**Figures 4A**). The preferred direction of the traced  
287 DSGCs was inferred from the mean orientation of starburst dendrites making  
288 ‘wraparound’ synapses onto the DSGCs, following the previous work of Briggman et al.  
289 (Briggman et al., 2011) (**Figure 4B**). Among all DSGCs, four preferred directions were  
290 seen roughly 90 degrees apart, as expected for most retinal locations (Sabbah et al.,  
291 2017). We selected three On-Off DSGCs for which the inferred preferred direction of  
292 motion fell on the horizontal axis like the cells we studied electrophysiologically, two with  
293 one motion preference, and the other with the opposite preference. Technical  
294 constraints prevented us from saying which cells preferred posterior motion and which  
295 cells preferred anterior motion (see Methods). We then mapped the distribution of  
296 bipolar ribbon synapses onto the dendrites of these three cells. We found no marked  
297 gradient in ribbon density across the preferred-null motion axis of the three cells  
298 (**Figures 4D – 4F**, **S4A – S4B**), suggesting that the gradient in EPSC density across  
299 this axis is not determined by the density of bipolar inputs.  
300

301 In addition to ribbon density, we also examined the time course of glutamatergic  
302 EPSCs in the presence of DH $\beta$ E and gabazine along the axis of maximal glutamatergic  
303 RF displacement and along the preferred-null motion axis. We found no significant  
304 differences in the latency, rise and decay times in EPSC waveforms across the axis of  
305 maximal glutamatergic RF displacement in response to the small flashing spots  
306 (**Figures 4G – 4I**, left panels). In addition, we did not detect a monotonic change in  
307 glutamatergic EPSC kinetics along the preferred-null motion axis in DH $\beta$ E and

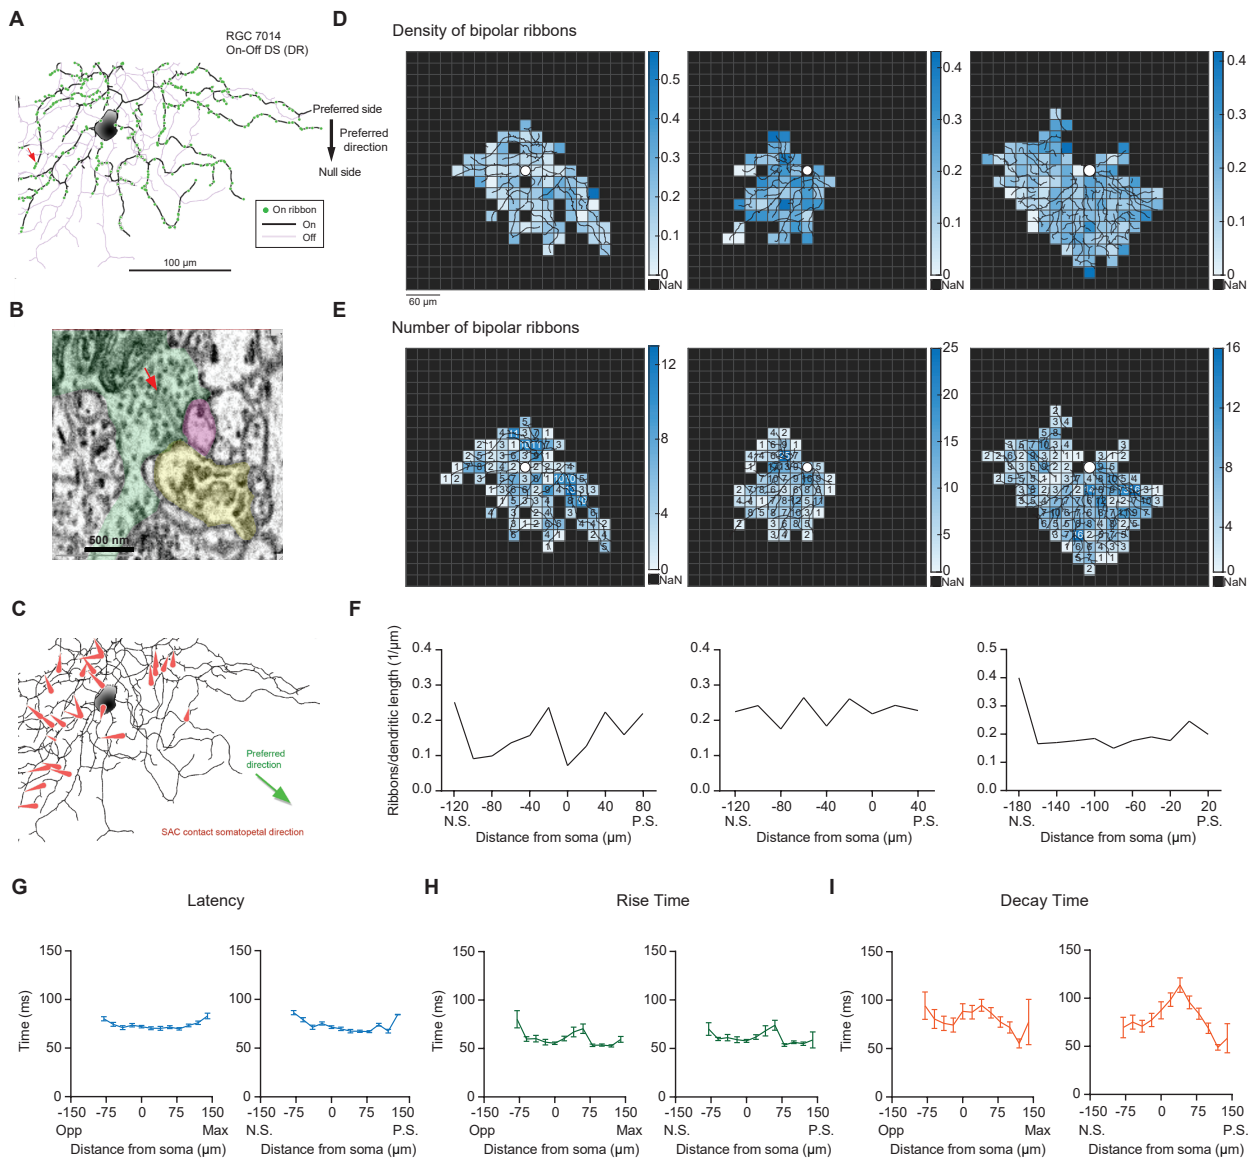

308  
309

310 **Figure 4. Neither the density of bipolar ribbon inputs nor the kinetics of glutamatergic EPSCs**  
311 **varies systematically along the axis of RF displacement.**

312 **(A)** Top: Distribution of ribbon synaptic input to one of the three reconstructed On-Off DSGCs. **(B)**  
313 Ultrastructure of the synapse indicated by the red arrow in **A**, as visualized by serial block-face electron  
314 microscopy. The presynaptic bipolar cell (green) belongs to Type 5t. Red arrow marks the ribbon. The  
315 magenta profile belongs to the On-Off DSGC. The other postsynaptic partner at this dyad synapse  
316 was another ganglion cell (yellow). Though only a fragment was included in the volume, it was  
317 presumably a DSGC, since it costratified entirely with the inner dendrites of the On-Off DSGC (**A**;  
318 black dendrites). **(C)** SAC inputs onto example On-Off DSGC. Red arrows indicate the direction and  
319 location of the SAC inputs on the DSGC dendrites. **(D)** Density map of bipolar ribbon synapses for 3  
320 example On-Off DSGCs with estimated preferred directions along the posterior-anterior axis (see  
321 Methods). The soma location is indicated by the white spot in the center. **(E)** Bipolar ribbon heat map  
322 for the 3 example cells, respectively. The number of ribbons in each square are indicated. **(F)**  
323 Quantification of ribbon density across the preferred-null axis, respectively. The soma location is at 0.

324 (N.S. = null side, P.S. = preferred side). **(G)** Left: Summary of latency of glutamatergic EPSC  
325 responses along the maximum-opposite axis (Max = maximum glutamatergic EPSC region, Opp =  
326 opposite region)(16 cells,  $p = 0.75$ ). Right: Summary of latency along the preferred-null motion axis  
327 (N.S. = null side, P.S. = preferred side)(16 cells,  $p = 0.88$ ). **(H)** Same as in **G**, except for rise time (10%  
328 - 90%). (Left:  $p = 0.12$ , right:  $p = 0.21$ , 16 cells). **(I)** Same as in **G**, except for decay time (90% - 30%).  
329 (Left:  $p = 0.25$ , right:  $p = 0.26$ , 16 cells). Summary statistics are mean  $\pm$  SEM.

330

331

332 gabazine (**Figures 4G – 4I**, right panels) or in DH $\beta$ E only (**Figures S4C and S4D**). That  
333 we find no differences in the kinetics of EPSC waveforms across the pDSGC dendritic  
334 field contrasts with a previous study of On DSGCs reporting a gradient of EPSC kinetics  
335 from slow/sustained to fast/transient along the preferred-null motion axis (Matsumoto et  
336 al., 2019). This gradient in On DSGC EPSC kinetics is thought to arise from different  
337 bipolar cell subtypes, and may implement a Hassenstein-Reichardt-Detector-like  
338 mechanism for the On DSGCs' direction selectivity. Thus, our data suggest that there are  
339 no marked differences in the subtypes of bipolar inputs along the preferred-null axis of  
340 On-Off pDSGCs.

341

#### 342 **Null-direction response emerges during partial activation of the displaced pDSGC** 343 **RF**

344

345 Because On-Off DSGCs are thought to be dedicated to encoding object motion,  
346 we next asked how the displaced excitatory RF of the pDSGC revealed by the  
347 stationary flashing stimuli contributes to motion processing. We reasoned that because  
348 conventional simple motion stimuli such as moving bars and drifting gratings traverse  
349 the entire RF of the pDSGC, SAC-mediated inhibition would exert a dominant influence  
350 on pDSGC spiking by strongly suppressing the pDSGC null-direction response.  
351 However, when motion trajectories are more complex, as often occurs in the natural  
352 environment, the displaced excitatory pDSGC RF may confer additional characteristics  
353 to the cell's motion encoding. Therefore, we investigated how the direction-selective  
354 circuit would process interrupted motion because moving objects in the natural  
355 environment often pass behind occluders or start moving from behind other objects.

356

357 To examine if the displaced excitatory RF of the pDSGC plays a role in encoding  
358 interrupted motion, we created an occluded motion stimulus where a moving bar  
359 disappeared behind a central occluder 220  $\mu$ m in diameter (**Figure 5A**). The occluder  
360 covered the dendritic span of the pDSGC and a substantial portion of its RF center. In  
361 contrast to the full-field motion stimuli, the occluded motion stimulus caused both  
362 preferred and null-direction spiking responses (**Figures 5B, S5A – S5C**). These  
363 responses are only evoked when the bar travels in the preferred side, which  
364 corresponds to the displaced side of the pDSGC RF (**Figure 5B**, middle row, **5C, S5B**

365 **and S5C**). In contrast, no spiking response is evoked when the bar moves across to the  
366 null side beyond the occluder (**Figures 5B**, bottom row, **5C**, **S5B** and **S5C**). To test  
367 whether this regional difference is due to the asymmetric wiring between SACs and  
368 DSGCs, we blocked the cholinergic and GABAergic transmission with DH $\beta$ E and  
369 gabazine and saw that the regional difference persisted (**Figures 5C** and **S5B**).  
370 Consistent with the spiking pattern, the EPSC responses also reflected this regional  
371 asymmetry (**Figure 5D**). In contrast, IPSC responses to the occluded bar stimulus are  
372 displaced to the opposite side compared to EPSC responses (**Figure S5D**), consistent  
373 with the asymmetric wiring pattern from SACs from the null side to the DSGC (Briggman  
374 et al., 2011; Fried et al., 2002; Lee and Zhou, 2010; Wei et al., 2011; Yonehara et al.,  
375 2011).  
376

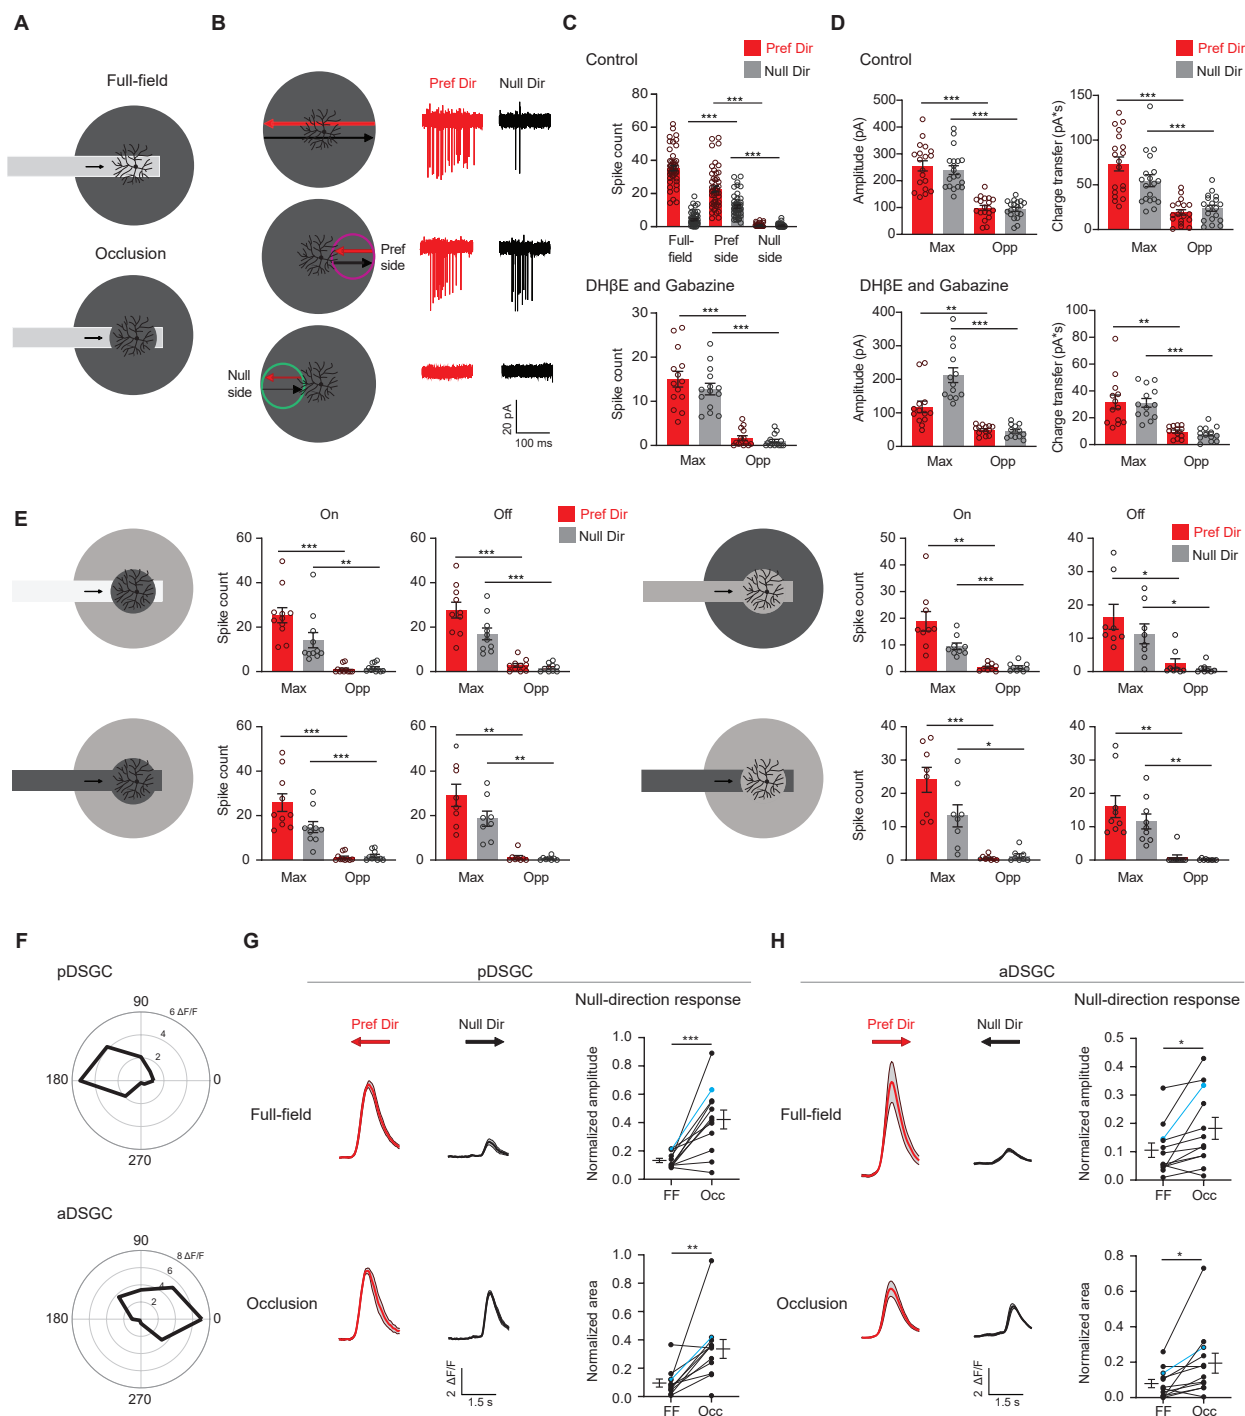

377  
378  
379  
380  
381  
382  
383  
384

**Figure 5. Displaced excitatory receptive field contributes to null-direction responses in the preferred region.**

**(A)** Full-field moving bar and occluded bar stimuli. **(B)** Example On spiking responses of a pDSGC to full-field bar (top) and occluded bar stimulus (middle, bottom) moving in the preferred (red) and null (black) directions. **(C)** Top: Mean spike counts of pDSGCs to the full-field moving bar (full-field) and the occluded moving bar on the preferred side and null side (48 cells). Bottom: Mean

385 spike counts in DH $\beta$ E + Gabazine to the occluded bar stimulus in the region evoking the maximum  
386 spiking (Max) and the opposite region (Opp) (13 cells). **(D)** Mean pDSGC EPSC peak amplitude  
387 and charge transfer in the region evoking the maximum response (Max) and the opposite region  
388 (Opp) in the control (top, 19 cells) and DH $\beta$ E + Gabazine (bottom, 13 cells) conditions. (In DH $\beta$ E  
389 + Gabazine: Pref Dir – Max vs Pref Dir – Opp amplitude  $**p = 0.0028$ , Pref Dir – Max vs Pref Dir  
390 – Opp charge transfer  $**p = 0.0012$ ). **(E)** Mean On and Off spiking responses to occluded bar  
391 stimulus at different contrast configurations. Top left: On: 11 cells, Max null dir. Vs Opp null dir.  
392  $**p = 0.008$ . Off: 10 cells. Bottom left: On: 10 cells. Off: 8 cells. Top right: On: 9 cells, Max pref.  
393 dir. Vs. Opp pref. dir.  $**p = 0.003$ . Off: 8 cells, Max pref. dir. Vs Opp. Pref. dir.  $*p = 0.034$ , Max  
394 null dir. Vs Opp null dir.  $*p = 0.02$ . Bottom right: On: 8 cells, Max null dir vs Opp null dir.  $*p =$   
395  $0.014$ . Off: 9 cells, Max pref. dir. Vs Opp pref. dir.  $**p = 0.004$ , Max null dir. Vs Opp null dir.  $**p =$   
396  $0.002$ . **(F)** Top: Example directional tuning curve of GCaMP6 signal of a pDSGC. Bottom:  
397 Example tuning curve of an aDSGC. **(G)** Top left: Example GCaMP6 fluorescence traces of a  
398 pDSGC for the full-field moving bar in the preferred (red) and null (black) directions. Bottom left:  
399 Example GCaMP6 traces of the cell for the occluded bar stimulus. Shaded areas represent SEM.  
400 Top right: Normalized amplitude of the posterior-preferring cell null-direction response during the  
401 full-field bar and the occluded bar (12 cells). Bottom right: Normalized area of the null-direction  
402 response during the full-field bar and the occluded bar (12 cells,  $**p = 0.0035$ ). **(H)** same as in **G**,  
403 except for aDSGCs. (12 cells, normalized amplitude  $*p = 0.013$ , normalized area  $*p = 0.019$ ).  
404 Summary statistics are mean  $\pm$  SEM,  $***p < 0.001$  except where specified otherwise.

405

406 Moreover, we blocked GABA<sub>C</sub> receptor activity, glycine receptor activity, and gap-  
407 junction coupling with TPMPA, strychnine, MFA, and Carbenoxolone, respectively, and  
408 found that the spatial asymmetry of the spike response remains during the occluded  
409 motion stimulus (**Figures S5H – S5K**). Based on these pharmacology results, we  
410 conclude that the asymmetric glutamatergic RF of the pDSGC contributes to robust  
411 spiking in both null and preferred directions when the preferred side of the RF is  
412 activated by the occluded motion stimulus.

413

414 Since there are two On-Off DSGC subtypes that are tuned to the opposite  
415 directions along the posterior-anterior axis, we investigated if the anterior-direction-  
416 selective DSGC (aDSGC) exhibits the same null-direction response pattern to the  
417 occluded motion stimulus as the pDSGC. To identify both DSGC subtypes, we  
418 performed calcium imaging of GCaMP6-expressing RGCs in another transgenic mouse  
419 line carrying Vglut2-IRES-Cre and floxed GCaMP6f (**Figure S6A**) during the full-field  
420 moving bar stimulus. We then used an online analysis to identify aDSGCs and pDSGCs  
421 based on the directional tuning of their calcium signals to the anterior and posterior  
422 motion directions (**Figures 5F and S6B – C**). Next, we centered the occluded motion  
423 stimulus on individual aDSGC and pDSGC somas and performed calcium imaging  
424 during the occluded motion stimulus. Consistent with pDSGC spiking activity, a  
425 significant null-direction calcium response of the pDSGCs was evoked when the  
426 occluded moving bar traveled across the receptive field to the preferred side of the RF



427 (Figures 5G and S6D). Notably, aDSGCs also exhibited a null-direction response to the  
 428 occluded motion stimulus that is similar to that of pDSGCs (Figure 5H and S6D),  
 429 indicating that aDSGC RFs are also displaced to the preferred side.  
 430

431 The above results show that continuous motion interrupted by a stationary  
 432 occluder in the center of the pDSGC's RF causes unexpected null-direction spiking as  
 433 the bar emerges from behind the occluder into the preferred side of the pDSGC RF.  
 434 However, this occluded motion stimulus cannot distinguish whether the interruption itself  
 435 or only the start position of the emerging bar was necessary for the null-direction  
 436 response. Therefore, we created a stimulus where a bar emerges at different locations  
 437 along the preferred-null motion axis of the cell. The start motion of the bar activates  
 438 different parts of the DSGC's receptive field (Figure 6A). For the null-direction moving  
 439 bar, there is an increase in both the spike number and the firing rate as the starting  
 440 position of the moving bar is located past the soma on the preferred side of the pDSGC  
 441 RF (Figures 6A – 6C). Thus, the emergent growing edge caused null-direction spiking  
 442 of pDSGCs in a similar pattern as the moving bar emerging behind the central occluder.  
 443 These results illustrate that the null-direction response of the pDSGC during the  
 444 occluded motion stimulus is dependent on the position in the receptive field from which  
 445 the moving edge emerges, not the previous motion approaching the occluder.  
 446

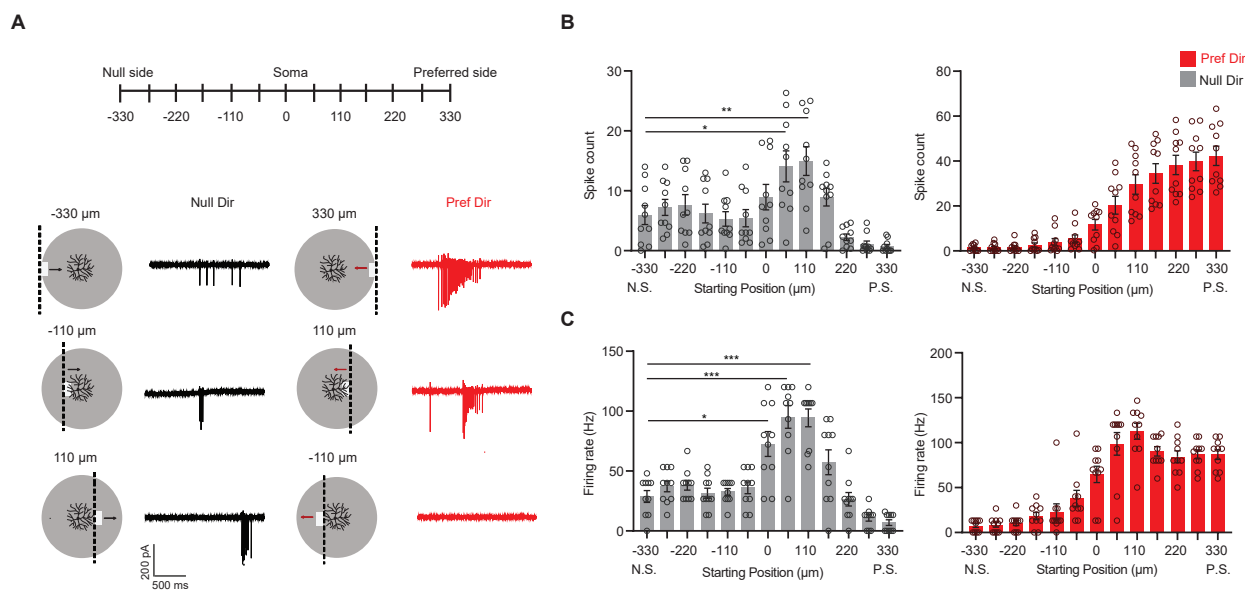

447  
 448  
 449 **Figure 6. Null-direction response is dependent on start position of emerging bar.**  
 450 (A) Schematic of moving bars emerging from different locations along the DSGC's preferred-null  
 451 motion axis and example spiking responses. The soma location is at 0. Vertical dashed lines on  
 452 the schematic indicate the positions of the emerging leading edge of the moving bar. (B) Mean  
 453 spike counts (null direction: -330 vs 55 \* $p = 0.012$ , -330 vs 110 \*\* $p = 0.0088$ ) and (C) firing rates

454 (null direction:  $-330$  vs  $0$  \* $p = 0.014$ ) to bars emerging from different locations along the preferred-  
455 null motion axis (10 cells). Summary statistics are mean  $\pm$  SEM, \*\*\* $p < 0.001$  except where  
456 specified otherwise.

457

458

### 459 **Null-direction responses of DSGCs during partial activation of their RFs can be** 460 **useful for decoding object location**

461

462 We explored how the displaced RFs could functionally benefit the computations  
463 performed by pDSGCs. First, we considered whether a displaced excitatory RF could  
464 benefit the direction-selective mechanisms during full-field smooth motion. By  
465 comparing the onset times of EPSCs and IPSCs to preferred-direction motion, we found  
466 that cells with more spatially separated excitatory and inhibitory receptive fields were  
467 more direction-selective (**Supplemental Figure 7M**).

468

469 Next, we considered scenarios when the displaced RF is partially activated by  
470 moving stimuli. Our experimental results show that pDSGCs generate robust spiking  
471 activity in both the preferred and null directions when a moving object appears and  
472 starts moving on the preferred side of the cell's RF, as when an object emerges from  
473 behind an occluder positioned over the cell's soma. We asked whether this prima facie  
474 aberrant signaling can have a functional role relevant to the behavioral goals of the  
475 organism.

476 We hypothesize that partial RF activation of a DSGC at a narrow region in visual  
477 space may provide precise information about the spatial position of a moving object  
478 along an interrupted motion trajectory. In particular, if a moving object emerging from  
479 behind an occluder activates the preferred side of an On-Off DSGC's RF, this DSGC  
480 would generate a null-direction spiking response together with the preferred-direction  
481 response of a nearby On-Off DSGC subtype preferring the opposite motion direction  
482 (**Figure 7A**). Such synchronous spiking activity between DSGCs of opposite preferred  
483 directions at the location of the occluder could yield a stronger and more localized  
484 spatial signal at the population level in response to interrupted motion.

485

486 To test how the null-direction response during interrupted motion might enhance  
487 downstream estimation of stimulus position, we simulated the spiking responses of  
488 pDSGCs in a population model consisting of On-Off DSGC subtypes that prefer  
489 opposite motion directions on the posterior-anterior axis (aDSGCs and pDSGCs, **Figure**  
490 **7A**). One thousand cells of each subtype were arranged in a two-dimensional array with  
491 biologically realistic positional jitter, such that the spatial positions of the two subtypes  
492 were uncorrelated. We simulated a bright edge moving along the posterior-anterior axis  
493 in a single direction at a constant velocity under both uninterrupted and interrupted  
494 motion conditions and analyzed the On response to the edge. The mean spiking

495 response of each DSGC was modeled as a rectified sine wave with parameters  
496 obtained from our experimental data, and sub-Poisson trial-to-trial variability was  
497 introduced to the mean spiking response on each trial (**Figure S7**). The spatial positions  
498 of the DSGCs were shuffled in each simulation block to allow us to sample different  
499 spatial arrangements of the RFs.

500  
501 Using a labeled-line decoder (see Methods), we compared the scenario in which  
502 none of the DSGCs were occluded (full-field) with the scenario in which a single  
503 occluder was placed near the center of the population. Our modeling results show that  
504 the null-direction response degrades the population estimate of the motion direction as  
505 would be expected (**Figure 7D**), but that the coincidence of the null-direction response  
506 from pDSGCs and the preferred-direction response of neighboring aDSGCs when the  
507 bar exits the occlusion substantially improves the estimation of bar position (**Figure 7C**).  
508 For a bar traveling at the speed of 330  $\mu\text{m}/\text{sec}$  (the lowest speed in our experiments  
509 and simulations), the synchronous firing between pDSGCs and the neighboring  
510 aDSGCs reduces the error in the population estimate of the bar edge's spatial position  
511 by over 80 percent. This reduction in error is present, albeit smaller, even at higher  
512 speeds. At the highest speed of 2640  $\mu\text{m}/\text{sec}$ , there was still around a 40 percent  
513 decrease in position estimation error during the occlusion trials. The absolute position  
514 error decrease was around 3 degrees of visual angle across bar speeds in models with  
515 low levels of background noise.

516 Because the displaced excitatory receptive field also induced differential firing  
517 responses to stationary spots presented outside of the cell's dendritic field (**Figure 1**),  
518 we asked whether the displacement was useful for detecting non-directional contrast  
519 changes for a small stationary spot. Receptive field mapping experiments showed that  
520 the spiking receptive field is displaced towards the preferred side. However, the total  
521 diameter of the asymmetric receptive field is around 220  $\mu\text{m}$ , which is larger than the  
522 average dendritic span of pDSGCs (**Figure S1H**). We analyzed whether a displaced  
523 receptive field would benefit the position estimation using non-directional contrast  
524 change signals. We found that the accuracy of estimating position from contrast  
525 changes is the same for populations with asymmetric receptive fields and populations  
526 with symmetric receptive fields. The detection of the contrast change would only  
527 improve if the receptive field size decreased (data not shown). Directed motion is  
528 required for an improvement in position estimation because a null-direction signal can  
529 only occur in a small region on the preferred side. Therefore, the synchrony of the null-  
530 direction and preferred-direction signals within the population yields a more spatially  
531 constrained signal necessary for fine spatial discrimination of moving stimuli.

532  
533 The synchronous firing may, itself, also be a useful alarm signal that triggers  
534 processing downstream of the retina, independent of the precise position information it

535 might additionally convey. To investigate whether the synchronous firing during  
536 occlusion trials can be read out from a population response, we utilized a coincidence  
537 decoder to determine whether full-field motion trials can be distinguished from occluded  
538 motion trials. A filter was fit to the null-direction spiking response from the occlusion  
539 trials (**Figure 7E**), and when the convolution of the firing rate with the filter rose above a  
540 threshold level (**Figure 7F**), the detector would identify an occlusion trial.

541  
542 Evaluating the decoder performance showed that the decoder is highly  
543 successful at identifying occlusion trials in conditions with low background firing rates. In  
544 conditions with background firing rates of 10 Hz or less, the decoder correctly identified  
545 occlusion trials with more than 99% accuracy (**Figure 7G**). This coincidence detection  
546 model suggests that the synchrony of preferred-direction responses from one DSGC  
547 subtype and the null-direction responses from the opposite DSGC subtype during  
548 interrupted motion conditions can be easily detected. This salient synchrony signal can  
549 potentially inform downstream visual areas of the type of motion that is occurring or  
550 provide an alarm signal to the animal that there is an unexpected change in their  
551 environment.  
552

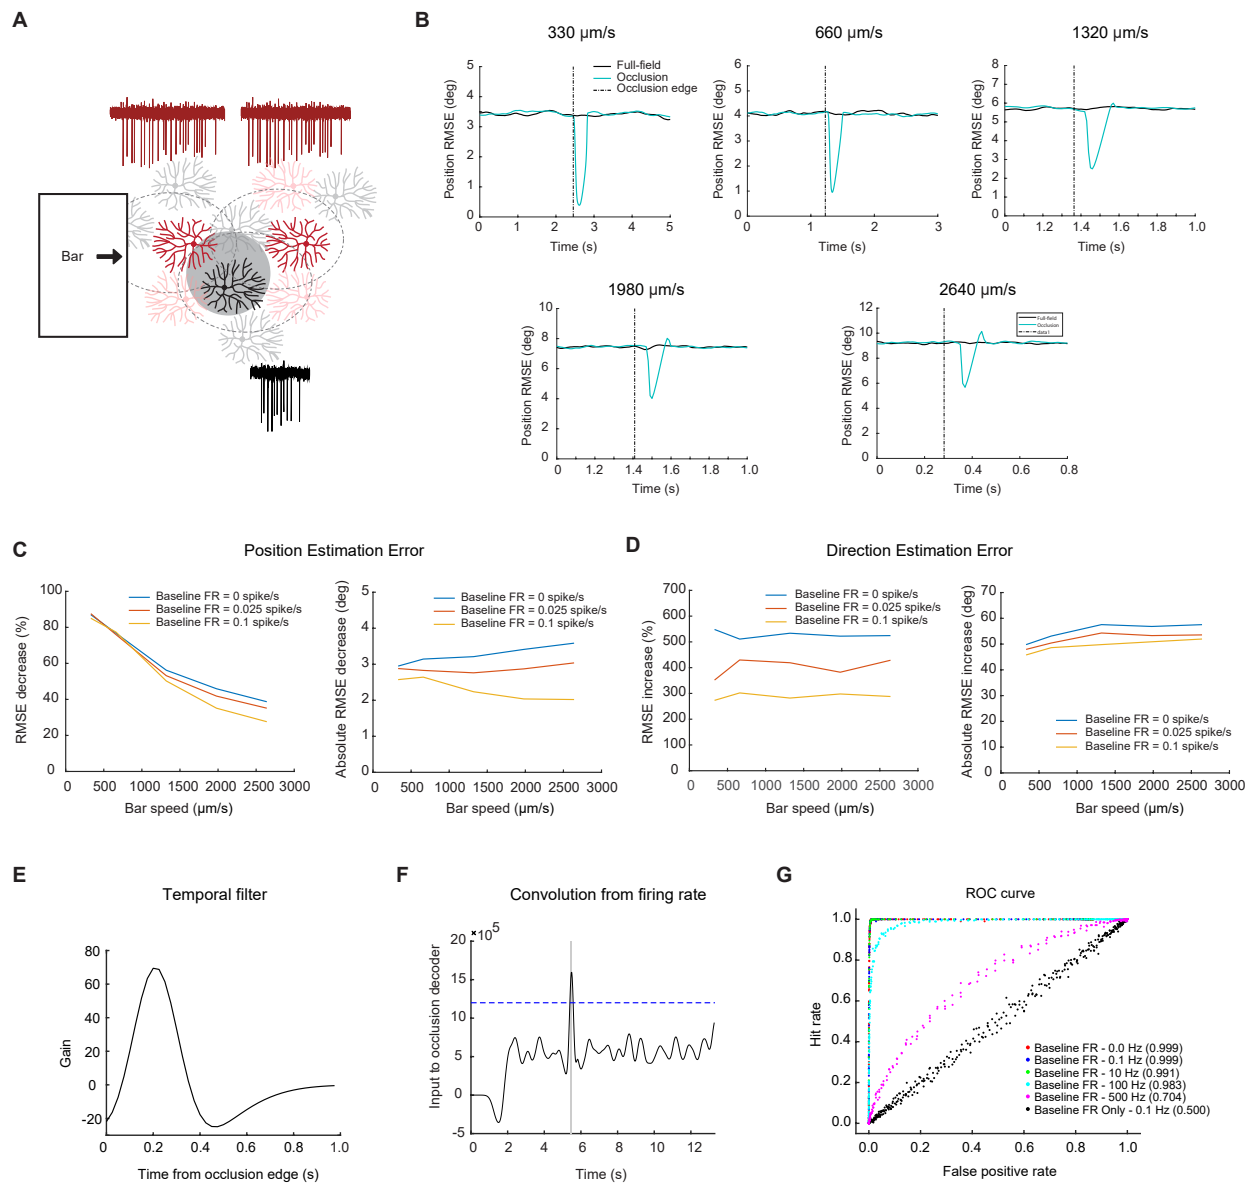

553  
 554  
 555 **Figure 7. Null-direction spiking of On-Off DSGCs during the occluded motion stimulus**  
 556 **improves position estimation.**  
 557 **(A)** Schematic of the DSGC population model along with example spike trains for two pDSGCs  
 558 (red trace showing their preferred-direction responses) and an aDSGC (black trace showing its  
 559 null-direction response). An occluder 220  $\mu\text{m}$  wide (shaded circle) was placed near the middle of  
 560 the population. **(B)** Example root-mean-square error in estimating the position of the light bar's  
 561 leading edge for full-field (black) and occluded (blue) motion across different bar speeds. **(C)** Left:  
 562 Position error percent decrease across speeds. Right: Absolute error decrease across bar speeds.  
 563 **(D)** Same as in **C**, but for direction estimation error. **(E)** Temporal filter for detecting occlusion  
 564 response. **(F)** Convolution of firing rate from the temporal filter. Dashed line represents example  
 565 threshold. **(G)** ROC curve with different levels of baseline firing for a bar of speed 330  $\mu\text{m}/\text{sec}$ .  
 566 Legend shows performance level of decoder for each level of baseline firing.

567 **Discussion**

568  
569 Our study reveals a new form of asymmetry in the direction-selective circuit: a  
570 spatial displacement of glutamatergic inputs to the preferred side of the On-Off pDSGCs  
571 due to a non-uniform distribution of synaptic conductances across the pDSGC dendritic  
572 span. The impact of this displaced excitation on DSGC spiking is demonstrated by using  
573 moving stimuli with interrupted trajectories, a feature abundant in natural scenes. In  
574 contrast to full-field continuous motion which maximizes the contribution of SAC-  
575 mediated null-direction inhibition, occluded motion stimuli reduce the contribution of  
576 SAC-mediated inputs to allow the excitatory receptive field to dominate the spiking  
577 response in a non-directional manner when only part of the RF is stimulated. Therefore,  
578 an On-Off DSGC's response to occluded motion stimuli is determined both by how  
579 much of the receptive field is activated and where that activation occurs.

580  
581 The non-isotropic excitation of the pDSGC alludes to a more sophisticated set of  
582 wiring and signaling mechanisms from the bipolar cell population (Franke et al., 2017).  
583 A detailed explanation of the glutamatergic RF displacement awaits future studies. The  
584 gradient of glutamatergic current density across the pDSGC dendritic span may arise  
585 from a number of possible scenarios including varying strengths of individual  
586 glutamatergic synapses, heterogeneous membrane properties across pDSGC dendritic  
587 field, and contribution from Vglut3+ amacrine cells (Kim et al., 2015; Lee et al., 2016).

588  
589 It is intriguing to speculate how the displaced excitatory receptive field properties  
590 of On-Off DSGCs can influence downstream computation. Previous theoretical analysis  
591 has addressed the encoding of motion direction by DSGCs at the population level  
592 (Fiscella et al., 2015; Zylberberg et al., 2016). In this study, we explored a hypothesis  
593 that On-Off DSGC population activity contains information about both the direction and  
594 the location of a moving object. When motion trajectories are not continuous, the null-  
595 direction responses from cells near the occlusion edge improves the encoding of  
596 location at the expense of direction encoding. We speculate that the trade-off between  
597 positional and directional encoding, which occurs when an object emerges from behind  
598 another object, may reflect the animal's greater need for positional information of the  
599 emerging object than the direction in which it is moving. Additionally, the synchronous  
600 response of null-direction and preferred-direction spiking can potentially provide a  
601 salient alarm signal for discontinuous motion, which may help the animal quickly attend  
602 to the site of the change. Considering the population activity of multiple subtypes of On-  
603 Off DSGCs after an interruption in the motion allows for the encoding of more  
604 information than motion direction. Our findings that the population activity across cell  
605 types can help resolve ambiguities in single cell responses share a common theme with  
606 previous modeling experiments from Kühn and Gollisch (2019), which show that  
607 multiple DSGCs subtypes with different motion direction tuning in the salamander retina  
608 are needed to isolate motion-related information from confounding contrast signals  
609 under complex texture motion. Our current investigation adds to the accumulating



610 evidence that retinal population activity across multiple subtypes enhances decoding of  
611 visual features from ambiguous, multiplexed signals.

612

613 In contrast to the On DSGC that encodes global motion during optic flow and  
614 participates in the optokinetic reflex, On-Off DSGCs are considered encoders of local  
615 motion, and project to the superficial layer of the superior colliculus (SC) and the shell  
616 region of the dorsal lateral geniculate nucleus (dLGN) (Cruz- Martín et al., 2014;  
617 Huberman et al., 2009; Rivlin-Etzion et al., 2011). In the SC, On-Off DSGC inputs give  
618 rise to the direction selectivity of postsynaptic collicular neurons (Shi et al., 2017),  
619 indicating that these collicular neurons do not receive retinal inputs from a broad range  
620 of RGC types, but specifically from On-Off DSGCs. Since the superficial layer of the SC  
621 is well recognized for its roles in encoding spatial locations and instructing stimulus-  
622 directed defensive and prey behaviors (Basso et al., 2021), the encoding of the spatial  
623 location of an emerging moving object by On-Off DSGCs may benefit rapid  
624 sensorimotor decisions that involve collicular circuitry.

625

626 It is likely that other ganglion cell types also participate in fine spatial  
627 discrimination. For example, certain types of small receptive field RGCs such as W3  
628 RGCs and HD-RGCs may also be well-suited encode object location (Jacoby et al.,  
629 2017; Kim et al., 2010; Zhang et al., 2012). It is worth noting that W3 RGCs are  
630 activated only in specific instances where the background is completely uniform,  
631 whereas On-Off DSGCs can be activated in a wide range of visual environments,  
632 including environments with noisy backgrounds (Chen et al., 2017; Chen et al., 2020).  
633 HD-RGCs also have small receptive fields, and computational modeling experiments  
634 have shown that the errors in object location between On-Off DSGCs after motion  
635 interruption and HD-RGCs are very similar in scale (Jacoby et al., 2017). However,  
636 given the divergent and type-specific central projection patterns of mouse ganglion cell  
637 types (Martersteck et al., 2017), the position information encoded by other position  
638 encoders such as W3 and HD-RGCs may not be available to the specific downstream  
639 circuits that receive On-Off DSGC inputs. Our modeling study suggests that the  
640 population response of On-Off DSGCs after a motion interruption helps On-Off RGCs  
641 achieve the same performance as other ganglion cell populations implicated in fine  
642 spatial discrimination.

643

644 Given the many outstanding questions on the retinorecipient circuitry, On-Off  
645 DSGCs may participate in different visual processing tasks compared to other ganglion  
646 cell types by projecting to different areas for implementing different responses (Kay et  
647 al., 2011; Sanes and Masland, 2015). Or, they could provide complementary  
648 information about the spatial location of moving objects when considered with other  
649 RGC populations. In either scenario, our theoretical analysis indicates that the  
650 information of spatial location is contained within the On-Off DSGC population  
651 response, and that it is possible that higher visual centers stand to benefit from this  
652 information. Ultimately, elucidating the roles of diverse RGC types in motion encoding  
653 requires a thorough understanding of visual signal transformations along the processing  
654 pathways and how the visual system instructs visually guided behavior.

655 **Acknowledgements**

656 We thank Chen Zhang for managing the mouse colony and Dr. John Maunsell, Dr.  
657 Siwei Wang, Mathew Summers, Malak El-Quessny, and Benjamin Hoshal for advice on  
658 the manuscript. This work was supported by NIH R01 EY024016 and the McKnight  
659 Scholarship Award to W. W., the NSF GRFP DGE-1746045 to J.D., NIH F31 EY029156  
660 to H.E.A., the NSF Career Award 1652617 and the Physics of Biological Function PHY-  
661 1734030 to S.E.P., and NIH RO1 EY012793 to D.B.

662

663 **Competing Interests**

664 All authors would like to report no competing interests.

665

666 **Methods**

667

668 **Animals**

669 *Chat-IRES-Cre* mice (129S6-Chat<sup>tm2(cre)Lowl/J</sup>) and floxed *tdTomato* mice (129S6-  
670 *Gt(ROSA)26Sor<sup>tm9(CAG-tdTomato)Hze/J</sup>*) were acquired from the Jackson Laboratory. *Drd4-*  
671 *GFP* mice were originally developed by MMRRRC  
672 (<http://www.mmrrc.org/strains/231/0231.html>) and were backcrossed to the C57BL/6  
673 background. These lines were crossed so that both pDSGCs and SACs were labeled.  
674 *Vglut2-IRES-Cre* mice and floxed *Ai95(RCL-GCaMP6f)-D* mice were acquired from  
675 Jackson Laboratory and were crossed and used for calcium imaging experiments. Mice  
676 of ages P21 – P60 of either sex were used. All procedures regarding the use of mice  
677 were in accordance with the University of Chicago Institutional Animal Care and Use  
678 Committee and with the NIH Guide for the Care and Use of Laboratory Animals and the  
679 Public Health Service Policy.

680

681 **Whole-mount retina preparation**

682 Mice were dark adapted for 1 hour and then were anesthetized with isoflurane and  
683 euthanized by decapitation. Retinas were isolated at room temperature in oxygenated  
684 Ames' medium (Sigma-Aldrich, St. Louis, MO) under infrared illumination. The retinas  
685 were separated into dorsal and ventral halves and were mounted ganglion-cell-layer up  
686 on top of a ~1.5 mm<sup>2</sup> hole in a small piece of filter paper (Millipore, Billerica, MA). The  
687 orientation of the posterior, anterior, inferior, and superior directions were noted for each  
688 piece. During the experimental day, the mounted retinas were kept in darkness at room  
689 temperature in Ames' medium bubbled with 95% O<sub>2</sub>/ 5% CO<sub>2</sub> until use (0 – 8h).

690

691 **Visual stimulation**

692 A white organic light-emitting display (OLEDXL, eMagin, Bellevue, WA; 800 X 600 pixel  
693 resolution, 60 Hz refresh rate) was controlled by an Intel Core Duo computer with a  
694 Windows 7 operating system and was presented to the retina at a resolution of 1.1

695  $\mu\text{m}/\text{pixel}$ . Visual stimuli were generated using MATLAB and the Psychophysics Toolbox,  
696 and were projected through the condenser lens of the two-photon microscope focused  
697 on the photoreceptor layer.

698  
699 For the peripheral spot experiments, stationary spots of size  $110 \mu\text{m}$  diameter were  
700 presented  $165 \mu\text{m}$  away from the soma of the recorded pDGSC for 2 seconds. At this  
701 distance, these spots were presented outside of the dendritic span of the majority of  
702 recorded pDSGCs. These spots were presented in 8 different locations  
703 pseudorandomized around the recorded pDSGC, with 3 repetitions each.

704  
705 For moving bar experiments, a bright moving bar with dimensions  $110 \mu\text{m}$  (width) X  $880$   
706  $\mu\text{m}$  (length) and speed  $330 \mu\text{m}/\text{s}$  moved in 8 different pseudorandomized directions  
707 across the receptive field of the pDSGC, with 3 – 6 repetitions each. The occluded bar  
708 stimulus contains a moving bar of the same dimensions which moves into and out of a  
709 central occluder with a diameter size of  $220 \mu\text{m}$ . The size of the occluder was large  
710 enough to obscure the entire dendritic span for the majority of recorded pDSGCs.  
711 Occluded bar stimuli of different contrasts were used. The population vector model in  
712 **Figure 7** required the use of bar and occluded bar stimuli at speeds of  $330 \mu\text{m}/\text{s}$ ,  $660$   
713  $\mu\text{m}/\text{s}$ ,  $1320 \mu\text{m}/\text{s}$ ,  $1980 \mu\text{m}/\text{s}$ , and  $2640 \mu\text{m}/\text{s}$ .

714  
715 For the emergent moving bar experiments where the bar emerged from different  
716 locations of the receptive field, a bright moving bar with dimensions  $110 \mu\text{m}$  (width) X  
717  $440 \mu\text{m}$  (length) and speed  $330 \mu\text{m}/\text{s}$  could start moving pseudorandomly from 13  
718 different locations across the receptive field (Figure 5). The bar could move in the  
719 preferred or null direction of the recorded cell.

720  
721 For the receptive field mapping experiments measuring spiking activity, bright spots with  
722 a  $60 \mu\text{m}$  diameter were presented across the receptive field of the recorded pDSGC.  
723 They were shown for 3 – 4 repetitions with a duration of 400 ms in a random sequence  
724 within an  $11 \times 11$  grid, covering a total area of  $660 \times 660 \mu\text{m}^2$ . For the receptive field  
725 mapping experiments measuring EPSC activity, bright spots with a  $20 \mu\text{m}$  diameter  
726 were presented across the pDSGC and were shown for 3 – 4 repetitions with a duration  
727 of 400 ms in a random sequence within an  $11 \times 11$  grid, covering a total area of  $220 \times$   
728  $220 \mu\text{m}^2$ . To examine the kinetics of EPSCs, bright spots with either a  $20 \mu\text{m}$  diameter  
729 (for DH $\beta$ E and gabazine experiments) or a  $60 \mu\text{m}$  diameter (for DH $\beta$ E experiments)  
730 were shown across the receptive field in a random sequence within an  $11 \times 11$  grid for  
731 3 – 4 repetitions. Spots were shown with a duration of 400 ms.

732  
733 The light intensity for bright peripheral spot experiments, the moving bar and occlusion  
734 experiments, and the receptive field mapping experiments was  $\sim 1.6 \times 10^4 \text{ R}^*/\text{rod}/\text{s}$ .

735 **Targeting cells for electrophysiology**

736 Cells were visualized with infrared light (>900 nm) and an IR-sensitive video camera  
737 (Watec). DSGCs were targeted with the aid of two-photon microscopy in *Drd4-GFP*  
738 mice. Cell identity was confirmed physiologically by extracellular recordings of  
739 responses to moving bars and/or by filling the cell with 25  $\mu$ M Alexa 594 (Life  
740 Technologies) to show bistratified dendritic morphology. Because the tissue was aligned  
741 on the filter paper, we confirmed that the preferred direction of the spiking responses to  
742 moving bar aligned well with the anatomical posterior (visual field coordinate) or nasal  
743 (retinal coordinate) direction.

744

745 **Quantification of dendritic morphology**

746 The On and Off layers of each cell was isolated from a z-stacked image in ImageJ. To  
747 calculate the radius, a contour of the dendritic span was made by drawing a boundary  
748 around the dendritic tips, and the area within the contour and resulting equivalent radius  
749 was calculated. For calculating dendritic length, the On layer from the z-stack projection  
750 was traced in NeuronStudio. The two-dimensional trace was then exported to MATLAB.  
751 Dendritic length was calculated in MATLAB using a custom-written code. We subdivided  
752 the cell into eight sectors for analysis. Sectors extended out from the soma and were  
753 aligned to the spot stimulus such that each spot was at the center between each  
754 sector's radial boundaries. When computing normalized vector sums (Figures 2B – C,  
755 S2A – S2B), total dendritic length in each sector was normalized by the total dendritic  
756 length of the cell.

757

758 **Serial electron-microscopic analysis**

759 We reconstructed DSGCs and starburst amacrine cells from a previously published  
760 SBEM dataset (Ding et al., 2016). These cell types were easily recognizable from their  
761 characteristic dendritic arbors and patterns of stratification. We inferred the preferred  
762 direction of motion of the DSGCs, relative to the boundaries of the volume from the  
763 orientation of SAC dendritic inputs onto the DSGC dendrites, as in Briggman et al.  
764 (2011). SAC dendrites preferentially form GABAergic synapses with DSGCs if their  
765 orientation, from soma to dendritic tip, corresponds to the null direction of the DSGC.  
766 Neither the eye of origin nor the retinal location of the sample was recorded when this  
767 sample was acquired, but it was possible to infer the ventral direction within the volume  
768 from reconstructions of multiple members of several other RGC types with strong  
769 dendritic asymmetries along the dorsoventral axis, including Jam-B RGCs (Kay et al.,  
770 2011) and F-RGCs (Rousso et al., 2016). One of the four On-Off DSGC types had an  
771 inferred preference for the ventral direction. Thus, we infer that the two types with  
772 preferred directions 90 degrees away from this ventral-motion-preferring DSGC type  
773 must therefore have been tuned to the horizontal motion axis. We could think of no way

774 to distinguish which of these types prefers anterior motion and which prefers posterior  
775 motion.

776

777 Ribbon synapses from On bipolar cells onto the dendrites of these three DSGCs were  
778 mapped manually. The branching patterns of all cells were reconstructed using  
779 skeletons and synapses were marked with single nodes using the Knossos software  
780 package (<https://knossostool.org/>).

781

782 To measure local ribbon density across the DSGC dendritic field, the dendritic span was  
783 divided into individual squares with 10 x 10  $\mu\text{m}$  (Figure S4) or 20 x 20  $\mu\text{m}$  (Figure 4)  
784 dimensions. Total dendritic length in each square was calculated in Matlab with a  
785 custom-written code. The total number of ribbon synapses in each square was also  
786 quantified. Ribbon density was calculated by dividing the ribbon synapse number by the  
787 total dendritic length in the appropriate squares.

788

### 789 **Electrophysiology recordings**

790 Recording electrodes of 3 – 5 M $\Omega$  were filled with a cesium-based internal solution  
791 containing 110 mM CsMeSO<sub>4</sub>, 2.8 mM NaCl, 4 mM EGTA, 5 mM TEA-Cl, 4 mM  
792 adenosine 5'-triphosphate (magnesium salt), 0.3 mM guanosine 5'-triphosphate  
793 (trisodium salt), 20 mM HEPES, 10 mM phosphocreatine (disodium salt), 5 mM N-  
794 Ethyllidocaine chloride (QX314), filled with a cesium-based internal solution containing  
795 110 mM CsMeSO<sub>4</sub>, 2.8 mM NaCl, 4 mM EGTA, 5 mM TEA-Cl, 4 mM adenosine 5'-  
796 triphosphate (magnesium salt), 0.3 mM guanosine 5'-triphosphate (trisodium salt), 20  
797 mM HEPES, 10 mM phosphocreatine (disodium salt), 5 mM N-Ethyllidocaine chloride  
798 (QX314), and 0.025 mM Alexa 594, pH 7.25. Retinas were kept in oxygenated Ames'  
799 medium with a bath temperature of 32 – 34 °C.

800

801 Data were acquired using PCLAMP 10 and a Multiclamp 700B amplifier (Molecular  
802 Devices, Sunnyvale, CA), low-pass filtered at 4 kHz and digitized at 10 kHz. Light  
803 evoked EPSCs were isolated by holding cells at -60 mV after correction for the liquid  
804 junction potential (~10 mV).

805

806 To isolate the contribution of synaptic inputs, a host of pharmacological agents were  
807 perfused in the bath during electrophysiology recordings. 8  $\mu\text{M}$  Dihydro-b-erythroidine  
808 hydrobromide (DH $\beta$ E; Tocris, Cat#2349); 10  $\mu\text{M}$  SR 9551 hydrobromide (gabazine;  
809 Tocris, Cat #1262); 100  $\mu\text{M}$  Meclofenamic acid sodium salt (MFA; Sigma-Aldrich,  
810 Cat#M4531); 1  $\mu\text{M}$  Strychnine (Sigma-Aldrich, Cat#S0532); 50  $\mu\text{M}$  TPMPA (Tocris,  
811 Cat#1040; 50  $\mu\text{M}$  Carbenoxolone disodium (Tocris, Cat#3096).

812

### 813 **Data analysis of electrophysiological recordings**



814 Spiking data from loose-patch recordings were analyzed using custom protocols in  
815 MATLAB. The number of spikes evoked by the response to the peripheral spots were  
816 quantified in MATLAB and averaged across 3 repetitions in 8 spatial locations. Light-  
817 evoked EPSC responses to peripheral spots were obtained as well, and 3 repetitions of  
818 EPSC traces were averaged to obtain the mean peak amplitude and charge transfer  
819 response to each condition. The RSI is determined by  $(\text{Max} - \text{Opp})/(\text{Max} + \text{Opp})$  where  
820 Max is the number of spikes, peak amplitude or charge transfer in the region of maximal  
821 activation using the peripheral spot stimulus, and Opp is the response in the region  
822 directly opposite to the Max region. EPSC parameters of latency, rise time (10 - 90%),  
823 and decay time (90 - 10%) were quantified to compare the whole cell kinetics after  
824 administration of DH $\beta$ E and gabazine to the control condition (Figure S1E).

825

826 For the receptive field mapping experiments, the light-evoked EPSCs in response to  
827 spots sized either 20  $\mu\text{m}$  or 60  $\mu\text{m}$  in diameter were obtained and averaged across 3 –  
828 4 repetitions. The displacement of the spiking RF was determined by using 60  $\mu\text{m}$   
829 spots. The distance from the soma to the edges of the receptive field on the preferred  
830 side versus the null side were determined (Figure S1H).

831

832 For the receptive field mapping EPSC experiments using 20  $\mu\text{m}$  spots, the center of  
833 mass of the receptive field was determined using the EPSC charge transfer or  
834 amplitude at each square in the 11 X 11 grid. The dendritic length was calculated at  
835 each point on the RF stimulus grid by summing the dendritic length in a circle 60  $\mu\text{m}$  in  
836 diameter centered on the square of interest. For maximum vs. opposite region analysis  
837 and the preferred side vs null side analysis (Figures 3E and 3F), we considered the  
838 EPSCs in two 5 X 5 subsets of the total grid located opposite of each other. The  
839 preferred-null side of each cell was determined by spiking responses to the full-field  
840 moving bar, and the maximum-opposite axis was determined by EPSC charge transfer  
841 responses to the peripheral spot experiment performed in DH $\beta$ E and gabazine. The  
842 distance from soma at each grid location was defined as the distance between the  
843 center of the square and the soma center.

844

845 To estimate the spatiotemporal profile across the maximum-opposite or the preferred-  
846 null axis for cells in DH $\beta$ E and gabazine, the light-evoked EPSCs in response to small  
847 spots sized 20  $\mu\text{m}$  in diameter were obtained and averaged across 3 – 4 repetitions  
848 (Figures 4F – 4H). To estimate the spatiotemporal profile across the preferred-null axis  
849 for cells in DH $\beta$ E only, the light-evoked EPSCs in response to small spots sized 60  $\mu\text{m}$   
850 in diameter were obtained and averaged across 3 repetitions (Figures S4C –D). For  
851 both experiments, EPSC parameters of latency, rise time (10 - 90%), and decay time  
852 (90 - 30%) were quantified. The preferred-null axis of each cell was determined by  
853 spiking responses to the full-field moving bar, and the maximum-opposite axis was



854 determined by EPSC charge transfer responses to the peripheral spot experiment  
855 performed in DH $\beta$ E and gabazine. The parameters of latency, rise time, and decay time  
856 were averaged across the squares at equal distances along the cell's preferred-null axis  
857 or maximum-opposite axis.

858  
859 Spiking data evoked by the moving bar and occlusion stimuli were quantified in  
860 MATLAB using 3 – 6 repetitions in 8 different directions. Spiking data evoked by the bar  
861 starting in different positions were quantified in MATLAB across 3 repetitions in the  
862 preferred and null directions.

863  
864

### 865 **Calcium imaging in posterior- and anterior-preferring On-Off DSGCs**

866 Genetically encoded calcium indicator GCaMP6f was expressed in all RGCs by  
867 crossing *Vglut2-IRES-Cre* mice (JAX 016963-*Slc17a6<sup>tm2(cre)Low</sup>*) and floxed *Ai95(RCL-*  
868 *GCaMP6f)-D* mice (JAX 028865-*Gt(ROSA)26Sor<sup>tm95.1(CAG-GCaMP6f)Hze/J</sup>*). GCaMP6f  
869 fluorescence from isolated retinas was imaged in a customized two-photon laser  
870 scanning fluorescence microscope (Bruker Nano Surfaces Division). GCaMP6 was  
871 excited by a Ti:sapphire laser (Coherent, Chameleon Ultra II, Santa Clara, CA) tuned to  
872 920 nm, and the laser power was adjusted to avoid saturation of the fluorescent signal.  
873 Onset of laser scanning induces a transient response in RGCs that adapts to the  
874 baseline in ~3 s. Therefore, to ensure the complete adaptation of this laser-induced  
875 response and a stable baseline, visual stimuli were given after 10 s of continuous laser  
876 scanning. To separate the visual stimulus from GCaMP6 fluorescence, a band-pass  
877 filter (Semrock, Rochester, MA) was placed on the OLED to pass blue light peaked at  
878 470 nm, while two notched filters (Bruker Nano Surfaces Division) were placed before  
879 the photomultiplier tubes to block light of the same wavelength. The objective was a  
880 water immersion objective (60x, Olympus LUMPlanFI/IR). Time series of fluorescence  
881 were collected at 15–30 Hz.

882 We performed an initial direction selectivity test to identify posterior- and anterior-  
883 preferring On-Off DSGCs. We recorded GCaMP6f fluorescence from RGC somas within  
884 a 75- $\mu$ m X 75- $\mu$ m field of view while presenting a full-field moving bar visual stimulus (a  
885 bright moving bar 110  $\mu$ m (width) X 880  $\mu$ m (length) moving at 330  $\mu$ m/s across a 660  
886  $\mu$ m circular mask diameter along 8 different directions). At the onset of each moving bar  
887 sweep, a TTL pulse was triggered by the visual stimulus computer and recorded by the  
888 imaging software to correlate GCaMP6f signals with the direction of each moving bar.  
889 Immediately following acquisition of each time series stack, custom-written MATLAB  
890 scripts were used to extract fluorescence over time data from time-series images and  
891 sort calcium transient by direction of the moving bar. For each RGC soma, raw  
892 GCaMP6f fluorescence traces and tuning curves were plotted. On-Off DSGCs were  
893 identified by their characteristic singular-lobe directional tuning curves, DSI values  $\geq 0.3$ ,

894 and two fluorescence peaks time-locked to the leading (On) and trailing edge (Off) of  
895 the moving bar. On-Off DSGCs with preferred directions along the posterior-anterior  
896 axis were then selected for further imaging.

897 Once an On-Off DSGC of interest was identified, the visual stimulus was centered to the  
898 soma of that cell and a new field of view was drawn to enclose this cell and some  
899 background with no GCaMP6f fluorescence. Full-field and occlusion moving bar visual  
900 stimulus were presented to the cells as described above (8 directions, 3-4 repetitions).  
901 Time series data was collected and subjected to offline analysis.

### 902 **Imaging analysis for calcium imaging**

903 Analysis was performed using ImageJ and MATLAB. Regions of interest (ROIs)  
904 corresponding to DSGC soma and background were manually selected in ImageJ. The  
905 fluorescent time course of each ROI was determined by averaging all pixels within the  
906 ROI for each frame. The fluorescence of the background region was subtracted from  
907 the raw fluorescent signal of the soma ROIs at each time frame. The visual stimulus  
908 included a 3 – 4 second intersweep interval between the end of one sweep and the start  
909 of another. Fluorescence intensities during these intersweep intervals were used to  
910 create a baseline ( $F_0$ ) trace for each ROI by fitting either a single- or two-term  
911 exponential decay function. Fluorescence measurements were then converted to  $\Delta F/F_0$   
912 values by calculating  $\Delta F = (F - F_0)/F_0$  for every datapoint. The transformed traces were  
913 then smoothed using an average sliding window of 4 datapoints.  $\Delta F/F_0$  traces were  
914 clipped, sorted by visual stimulus direction (0, 45, 90, 135, 180, 225, 270, and 315  
915 degrees), and averaged over 3-4 trials. Prior to further analysis, ROIs were subjected  
916 to a response quality test  $QI = \text{Var}[\text{Avg. Resp}]/\text{Avg}(\text{Var}[R(t)]) \geq 0.45$  to ensure  
917 consistency across trials. Responses to the full-field and occlusion moving bars were  
918 broken up into On and Off components according to the circular mask entrance and exit  
919 times of the leading and trailing edge, respectively. Peak, area  $\Delta F/F_0$ , and time of peak  
920 values were calculated for On, Off, and the full trace along all 8 directions. Direction  
921 selectivity index (DSI), vector sum, and preferred direction were calculated for both On  
922 and Off components.

923

### 924 **Statistical analysis**

925 Grouped data are presented as mean  $\pm$  SEM. The Kolmogorov-Smirnov test was used  
926 to test data for normality. Student's t-test was used for statistical comparisons of paired  
927 samples in Figures 1 and 2. One-way analysis of variance was performed on grouped  
928 data in Figures 5 and 6 and subjected to Bonferroni correction.

929

930 For the EPSC/dendritic length vs distance from soma experiments, we performed linear  
931 regression analysis using an additional categorical predictor variable indicating the  
932 maximum-opposite or the preferred-null side. The p-value associated with interaction

933 term (distance\*region) in the resulting model was used to determine whether the slopes  
934 are significantly different between the two regions. For the EPSC vs dendritic length  
935 experiments, we again performed linear regression with an additional categorical  
936 predictor variable indicating the maximum-opposite or preferred-null region. The p-value  
937 associated with the categorical predictor in the resulting model was used to determine  
938 whether the y-intercepts were significantly different between the two regions. The p-  
939 value associated with the categorical predictor was used to determine whether the y-  
940 intercepts were significantly different between regions. The number of branches in each  
941 square of the grid was determined by a custom MATLAB code.

942

943 For the kinetic analyses of EPSC parameters in the receptive field mapping experiments  
944 of latency, rise time, and decay time, we performed linear regression analysis to  
945 determine whether a statistically significant linear relationship exists between the  
946 distance from the soma and each EPSC parameter.

947

948 For all data sets,  $p < 0.05$  was considered significant. \* $p < 0.05$ ; \*\* $p < 0.01$ ; \*\*\* $p < 0.001$ .

949

### 950 **Experimental parameters for population model**

951 Experimental data for the spiking response to full-field (73 cells) and occlusion (69 cells)  
952 stimuli moving with a constant speed of 330  $\mu\text{m}/\text{second}$  were obtained. 3 – 6 repetitions  
953 were obtained for each full-field or occlusion protocol. The baseline firing rate for each  
954 repetition was obtained by binning the spiking response in 25-ms time bins and taking  
955 the maximum firing rate during a silent period where no stimulus was displayed, and the  
956 baseline firing rate was averaged across all repetitions.

957

958 To model the spiking response of the pDSGCs, we binned the spikes evoked by the On  
959 response to the motion stimulus in 25-ms time bins and plotted the PSTHs for all 8  
960 motion directions. Then, we fit a rectified sine wave to the PSTH of each pDSGC. We  
961 defined the threshold for above-baseline firing to be 4 SD above the baseline firing rate.  
962 The onset of the spiking response was determined by the time bin at which the firing  
963 rate exceeded the threshold and was immediately followed by a second above-  
964 threshold bin (Rate change method; Levakova et al., 2015). We inspected the spiking  
965 response onset times returned by our detection algorithm and manually adjusted the  
966 spiking response onset times for 3 out of 91 pDSGCs to match the experimental data.

967

968 Onset times of spiking responses to the full-field bar moving in the preferred direction  
969  $\pm 45$  degrees were similar to those of the preferred-direction response (Figure S7A,  
970 left). Likewise, onset times of spiking responses to the occlusion stimulus moving in the  
971 null direction  $\pm 45$  degrees were similar to those of the null-direction response (Figure  
972 S7A, right). Therefore, we included onset times of spiking responses to motions in the

973 directions  $\pm 45$  degrees from the preferred-null motion axis in our analysis. Four-  
974 parameter beta distributions were fit to histograms of spiking response onset times for  
975 preferred- and null-direction motions (Figure S7F). The four parameters included two  
976 shape parameters and two parameters that specify the minimum and maximum of the  
977 distribution's range.

978  
979 To determine the offset of the spiking response, we used the algorithm for identifying  
980 spiking response onset. Unlike the protocol for determining spiking response onset,  
981 however, the detection algorithm started from the most recent time bin and traversed  
982 backwards in time. The offset of the spiking response was defined to be the time bin at  
983 which the firing rate exceeded the threshold in two out of three consecutive time bins.  
984 For each pDSGC, we calculated the spiking response duration by finding the difference  
985 between the spiking response onset and offset times. Furthermore, we calculated the  
986 linear correlation between spiking response duration and onset (Figure S7G). Figure  
987 S7B shows that using only spiking responses to motion along the preferred-null motion  
988 axis and using spiking responses to motion along the preferred-null motion axis as well  
989 as motion in the directions 45 degrees away from the preferred-null motion axis yielded  
990 consistent results. We also calculated the linear correlation between peak firing rate and  
991 spiking response onset, but the correlation was not significant for the full-field protocol  
992 (Figure S7C).

993

### 994 **Motion direction tuning curves**

995 We computed motion direction tuning curves for all pDSGCs exposed to the full-field  
996 moving bar stimulus (73 cells) using the CircStat toolbox in MATLAB developed by P.  
997 Berens (2009). The height of each tuning curve was given by the total spike count  
998 evoked during the presentation of the full-field moving bar stimulus. We fit a Gaussian  
999 function to the histogram of the tuning curve widths (Figure S7H). Figure S7I shows all  
1000 the normalized motion direction tuning curves. The heights of the tuning curves were  
1001 rescaled by dividing by their peaks and the widths of the tuning curves were rescaled by  
1002 dividing by their angular deviation, which is the square-root of twice the circular  
1003 variance. The normalized tuning curves were fit to a one-term Gaussian model (Figure  
1004 S7I).

1005

### 1006 **Speed Tuning Analysis**

1007 To investigate whether the null-direction response remains robust at higher stimulus  
1008 speeds, experimental data for the spiking response to full-field and occlusion stimuli  
1009 moving at 660, 1320, 1980, and 2640  $\mu\text{m/s}$  were further collected. We analyzed how the  
1010 spike count, onset, and duration of the null-direction response changed across bar  
1011 speeds (Figure S7J–L). Spiking response onset and offset were calculated using the  
1012 same method as before. Linear fits were performed on spiking response onset data

1013 across speeds for both full-field and occlusion protocols (Figure S7K). Spiking response  
1014 durations were first normalized by the response duration when the bar speed was at  
1015 330  $\mu\text{m/s}$  and then fit to power-law functions (Figure S7L). Simulation parameters for  
1016 stimulus speeds higher than 330  $\mu\text{m/s}$  were adjusted according to the fit functions in  
1017 Figure S7K and L.

1018

### 1019 **Two-dimensional population model**

1020 In our computational model, we arranged two populations (left motion-preferring and  
1021 right motion-preferring) of DSGCs in a two-dimensional array. Each population had  
1022 1,000 cells. Within each population, horizontal and vertical distances between nearest  
1023 neighbors were Gaussian distributed, with a mean of 39  $\mu\text{m}$  and a SD of 16  $\mu\text{m}$   
1024 (Huberman et al., 2009). The spatial positions of the DSGCs between the two  
1025 populations were uncorrelated.

1026

1027 Each DSGC's mean spiking response to the moving edge was modeled as a rectified  
1028 sine wave. The amplitude of the sine wave was given by the peak firing rate, while the  
1029 period and phase were determined by the spiking response duration and onset time,  
1030 respectively. For each spatial arrangement of DSGCs, we sampled peak firing rates  
1031 directly from our experimental data. We sampled spiking response onset times from our  
1032 four-parameter beta distributions (Figure S7F) and determined the spiking response  
1033 durations by finding the linear correlation between the two (Figure S7G). For simulations  
1034 with bar stimuli moving at speeds higher than 330  $\mu\text{m/s}$ , spiking response onset times  
1035 and durations were modified according to the speed of the bar (Figure S7K and L).

1036

1037 Noise was introduced into the preferred directions of the DSGCs so that they were not  
1038 all perfectly aligned with the left/right motion axis. To determine the degree of jitter in a  
1039 DSGC's preferred direction, we sampled from a uniform distribution ranging from -14.1  
1040 degrees to +14.1 degrees, where 0 degrees represented a preference for motion  
1041 directly along the left/right motion axis (Fiscella et al., 2015).

1042

1043 To determine the motion direction tuning width of each simulated DSGC, we sampled  
1044 circular variances from a Gaussian distribution fit to the histogram of circular variance of  
1045 the tuning curves from our experimental data (Figure S7H). We scaled the collapsed  
1046 tuning curve (Figure S7I) by the sampled tuning width and peak firing rate to obtain the  
1047 tuning curve. We used the motion direction tuning curve to adjust the peak firing rate of  
1048 the spiking response according to the jitter in the preferred direction alignment.

1049

1050 We simulated the DSGC population response to a moving edge traveling from left to  
1051 right at a constant speed. To simulate the occlusion protocol, we introduced an  
1052 occlusion 220  $\mu\text{m}$  in diameter whose position in space was fixed at 1800  $\mu\text{m}$  along the

1053 horizontal axis and 800  $\mu\text{m}$  along the vertical axis (approximately in the center of the  
1054 two-dimensional array). For each spatial arrangement of DSGCs, the simulation was  
1055 repeated 10 times. The spiking response of each DSGC was discretized in time.

1056  
1057 At each 10-ms time bin, the firing rate given by the rectified sine wave fit was converted  
1058 to a mean spike count. The number of spikes generated by a DSGC was obtained by  
1059 sampling from a Gaussian distribution with this mean and a sub-Poisson, constant  
1060 variance of 0.4. The sub-Poisson noise was determined from our experimental data by  
1061 analyzing the variance of the spiking responses to 6 repetitions of the full-field moving  
1062 bar (10 cells) and the occlusion stimulus (9 cells) (Figure S7D). The spatial positions of  
1063 the DSGCs were shuffled in each simulation block for a total of 100 blocks with 10  
1064 repetitions in each block.

### 1065 1066 **Position decoding**

1067 The spatial position of the moving bar's leading edge was estimated via a labeled-line  
1068 decoder (Dayan and Abbott, 2001). At each time point, the position estimate  $\hat{x}$  was  
1069 given by the weighted average of the DSGCs' RF center positions

1070  
1071

$$\hat{x} = \frac{\sum_i r_i \tilde{x}_i / w_i^2}{\sum_i r_i / w_i^2}$$

1072  
1073 where  $r_i$  is the firing rate of the  $i^{\text{th}}$  cell and  $\tilde{x}_i \sim \mathcal{N}(x_i, w_i^2)$  where  $x_i$  is the RF center  
1074 position and  $w_i$  the RF width (radius) of the  $i^{\text{th}}$  cell. The RF width was taken to be the 1  
1075 SD boundary of the Gaussian center profile (Chichilnisky and Kalmar, 2002). RF widths  
1076 were obtained by scaling the dendritic field radii by 1.25. Dendritic field radii were  
1077 obtained by sampling from Gaussian distribution with  $\mu = 88 \mu\text{m}$  and  $\sigma = 14.8 \mu\text{m}$ .  
1078 Position labels of the cells were determined by considering the extent of spatial  
1079 displacement on the preferred side. Errors are reported as the root mean-square-error  
1080 in the position estimate (Figure 7B).

### 1081 1082 1083 **Coincidence detection**

1084 To assess the salience of the synchronous firing between two oppositely tuned  
1085 subtypes of DSGCs, we constructed a coincidence decoder that consisted of a  
1086 convolution with a temporal filter and a threshold operation, similar to Schwartz et al.,  
1087 2007. At each time point, a difference-of-Gaussian temporal filter (Figure 7E) was  
1088 convolved with the simulated DSGC population firing-rate activity. When the output of  
1089 the convolution exceeded the threshold, the decoder determined that a coincidence of  
1090 spiking activity between DSGC subtypes has occurred. For correct detections, the  
1091 output must exceed the threshold during a time window of 125 ms around the occlusion



1092 event when the bar emerges from behind the occluder (Figure 7F). All above-threshold  
1093 outputs outside of the time window were marked as false alarms. By varying the  
1094 threshold across multiple simulations, we computed the receiver operator characteristic  
1095 (ROC) (Green and Swets, 1966). We quantified the performance of the decoder under  
1096 different levels of background firing noise using the area under the ROC curve (Figure  
1097 7G).

1098

## 1099 **References**

1100

1101 Barlow, H. B. and Hill, R. M. (1963). Selective sensitivity to direction of movement in  
1102 ganglion cells of rabbit retina. *Science* **139**, 412–414.

1103

1104 Barlow, H.B., and Levick, W.R. (1965). The mechanism of directionally selective units in  
1105 rabbit's retina. *J. Physiol.* **178**, 477–504.

1106

1107 Basso, M.A., Bickford, M.E., and Cang, J. Unraveling circuits of visual perception and  
1108 cognition through the superior colliculus. *Neuron* **109**,  
1109 <https://doi.org/10.1016/j.neuron.2021.01.013>

1110

1111 Briggman, K.L., Helmstaedter, M., and Denk, W. (2011). Wiring specificity in the  
1112 direction-selectivity circuit of the retina. *Nature* **471**, 183–188.

1113

1114 Chen, Q., Pei, Z., Koren, D., and Wei, W. (2016). Stimulus-dependent recruitment of  
1115 lateral inhibition underlies retinal direction selectivity. *Elife* **5**, e21053.

1116

1117 Chen, Q., Smith, R.G., Huang, X., and Wei, W. (2020). Preserving inhibition with a  
1118 disinhibitory microcircuit in the retina. *Elife* **9**, e62618.

1119

1120 Chiao, C.C., and Masland, R.H. (2003). Contextual tuning of direction-selective retinal  
1121 ganglion cells. *Nat. Neurosci.* **6**, 1251–1252.

1122

1123 Chichilnisky, E.J. and Kalmar, R.S. (2002). Functional asymmetries in ON and OFF  
1124 ganglion cells of primate retina. *J. Neurosci.* **22**, 2737–2747.

1125

1126 Cruz-Martín, A., El-Danaf, R.N., Osakada, F., Sriram, B., Dhande, O.S., Nguyen, P.L.,  
1127 Callaway, E.M., Ghosh, A., and Huberman, A.D. (2014). A dedicated circuit links  
1128 direction-selective retinal ganglion cells to the primary visual cortex. *Nature* **507**, 358–  
1129 361.

1130

- 1131 Dayan, P. and Abbott, L. (2001). Theoretical neuroscience - computational and  
1132 mathematical modeling of neural systems. Cambridge, MA: MIT Press.  
1133
- 1134 Demb, J. B., Haarsma, L., Freed, M. A. and Sterling, P. (1999). Functional circuitry of  
1135 the retinal ganglion cell's nonlinear receptive field. *J. Neurosci.* **19**, 9756–9767.  
1136
- 1137 Deny, S., Ferrari, U., Macé, E., Yger, P., Caplette, R., Picaud, S., Tkačik, G., and Marre,  
1138 O. (2017). Multiplexed computations in retinal ganglion cells of a single type. *Nat.*  
1139 *Commun.* **8**, 1964.  
1140
- 1141 Dhande, O.S., Stafford, B.K., Lim, J.-H.A., and Huberman, A.D. (2015). Contributions of  
1142 retinal ganglion cells to subcortical visual processing and behaviors. *Annu. Rev. Vis.*  
1143 *Sci.* **1**, 291–328.  
1144
- 1145 Ding, H., Smith, R.G., Poleg-Polsky, A., Diamond, J.S., and Briggman, K.L. (2016).  
1146 Species-specific wiring for direction selectivity in the mammalian retina. *Nature* **535**,  
1147 105–110.  
1148
- 1149 Ellis, E.M., Gauvain, G., Sivyer, B., and Murphy, G.J. (2016). Shared and distinct retinal  
1150 input to the mouse superior colliculus and dorsal lateral geniculate nucleus. *J.*  
1151 *Neurophysiol.* **116**, 602–610.  
1152
- 1153
- 1154 El-Quessney, M., Maanum, K., and Feller, M.B. (2020). Visual experience influences  
1155 dendritic orientation but is not required for asymmetric wiring of the retinal direction  
1156 selective circuit. *Cell Rep.* **31**, 107844.  
1157
- 1158 Euler, T., Detwiler, P. B. and Denk, W. (2002). Directionally selective calcium signals in  
1159 dendrites of starburst amacrine cells. *Nature* **418**, 845–852.  
1160
- 1161 Famiglietti, E. V. (1983). “Starburst” amacrine cells and cholinergic neurons: mirror-  
1162 symmetric ON and OFF amacrine cells of rabbit retina. *Brain Res.* **261**, 138–144.  
1163
- 1164 Fiscella, M., Franke, F., Farrow, K., Müller, J., Roska, B., da Silveira, R.A., and  
1165 Hierlemann, A. (2015). Visual coding with a population of direction-selective neurons. *J.*  
1166 *Neurophysiol.* **114**, 2485–2499.  
1167
- 1168 Franke, K., Berens, P., Schubert, T., Bethge, M., Euler, T., and Baden, T. (2017).  
1169 Inhibition decorrelates visual feature representations in the inner retina. *Nature* **542**,  
1170 439–444.

- 1171 Fried, S.I., Münch, T.A., and Werblin, F.S. (2002). Mechanisms and circuitry underlying  
1172 directional selectivity in the retina. *Nature* **420**, 411–414.  
1173
- 1174 Green, D. M., and Swets, J. A. (1966). *Signal detection theory and psychophysics*. John  
1175 Wiley.  
1176
- 1177 Grzywacz, N.M., and Amthor, F.R. (2007). Robust directional computation in on-off  
1178 directionally selective ganglion cells of rabbit retina. *Vis. Neurosci.* **24**, 647–661.  
1179
- 1180 He, S., Jin, Z.F., and Masland, R.H. (1999). The nondiscriminating zone of directionally  
1181 selective retinal ganglion cells: comparison with dendritic structure and implications for  
1182 mechanism. *J. Neurosci.* **19**, 8049–8056.  
1183
- 1184 He, S., and Masland, R.H. (1998). ON direction-selective ganglion cells in the rabbit  
1185 retina: Dendritic morphology and pattern of fasciculation. *Vis. Neurosci.* **15**, 369–375.  
1186
- 1187 Huang, X., Rangel, M., Briggman, K.L., and Wei, W. (2019). Neural mechanisms of  
1188 contextual modulation in the retinal direction selective circuit. *Nat. Commun.* **10**, 2431.  
1189
- 1190 Huberman, A.D., Wei, W., Elstrott, J., Stafford, B.K., Feller, M.B., and Barres, B.A.  
1191 (2009). Genetic identification of an On-Off direction- selective retinal ganglion cell  
1192 subtype reveals a layer-specific subcortical map of posterior motion. *Neuron* **62**, 327–  
1193 334.  
1194
- 1195 Ishikane, H., Gangi, M., Honda, S., Tachibana, M. (2005). Synchronized retinal  
1196 oscillations encode essential information for escape behavior in frogs. *Nat.*  
1197 *Neurosci.* **8**, 1087–1095.  
1198
- 1199 Ito, S., and Feldheim, D.A. (2018). The mouse superior colliculus: An emerging model  
1200 for studying circuit formation and function. *Front. Neural Circuits* **12**, 10.  
1201
- 1202 Jacoby, J. and Schwartz, G.W. (2017). Three small-receptive-field ganglion cells in the  
1203 mouse retina are distinctly tuned to size, speed, and object motion. *J Neurosci.* **37**, 610–625.  
1204
- 1205 Kay, J.N., de la Huerta, I., Kim, I.J., Zhang, Y., Yamagata, M., Chu, M.W., Meister, M.,  
1206 and Sanes, J.R. (2011). Retinal ganglion cells with distinct directional preferences differ  
1207 in molecular identity, structure, and central projections. *J. Neurosci.* **31**, 7753–7762.  
1208

- 1209 Kim., I.J., Zhang, Y., Meister, M., and Sanes, J.R. (2010). Lamina restriction of retinal  
1210 ganglion cell dendrites and axons: subtype-specific development patterns revealed with  
1211 transgenic markers. *J. Neurosci* **30**, 1452–1462.  
1212
- 1213 Kim, T., Soto, F., and Kerschensteiner, D. (2015). An excitatory amacrine cell detects  
1214 object motion and provides feature-selective input to ganglion cells in the mouse retina.  
1215 *Elife* **4**, e08025.  
1216
- 1217 Kittila, C.A., and Massey, S.C. (1997). Pharmacology of directionally selective ganglion  
1218 cells in the rabbit retina. *J. Neurophysiol.* **77**, 675–689.  
1219
- 1220 Kühn, N.K., and Gollisch, T. (2019). Activity correlations between direction-selective  
1221 retinal ganglion cells synergistically enhance motion decoding from complex visual  
1222 scenes. *Neuron* **101**, 963–976.  
1223
- 1224 Lee, S., Kim, K., and Zhou, Z.J. (2010). Role of ACh-GABA cotransmission in detecting  
1225 image motion and motion direction. *Neuron* **51**, 787–799.  
1226
- 1227 Lee, S., Zhang, Y., Chen, M., and Zhou, Z.J. (2016). Segregated glycine-glutamate co-  
1228 transmission from vGluT3 amacrine cells to contrast-suppressed and contrast-  
1229 enhanced retinal circuits. *Neuron* **90**, 27–34.  
1230
- 1231 Levakova, M., Tamborrino, M., Ditlevsen, S., and Lansky, P. (2015). A review of the  
1232 methods for neuronal response latency estimation. *Biosystems* **136**, 23–34.  
1233
- 1234 Lipin, M.Y., Rowl Taylor, W., and Smith, R.G. (2015). Inhibitory input to the direction-  
1235 selective ganglion cell is saturated at low contrast. *J. Neurophysiol.* **114**, 927–941.  
1236
- 1237 Marre, O., Botella-Soler, V., Simmons, K.D., Mora, T., Tkačik, G., and Berry, M.J.  
1238 (2015). High accuracy decoding of dynamical motion from a large retinal population.  
1239 *PLoS Comput. Biol.* **11**, e1004304.  
1240
- 1241 Matsumoto, A., Briggman, K.L., and Yonehara, K. (2019). Spatiotemporally asymmetric  
1242 excitation supports mammalian retinal motion sensitivity. *Curr. Biol.* **29**, 3277–3288.  
1243
- 1244 Ölveczky, B. P., Baccus, S. A. and Meister, M. (2003). Segregation of object and  
1245 background motion in the retina. *Nature* **423**, 401–408.  
1246
- 1247 Oyster, C.W., (1968). The analysis of image-motion by the rabbit retina. *J Physiol.* **199**,  
1248 613-635.

- 1249 Oyster, C.W., and Barlow, H.B. (1967). Direction-selective units in rabbit retina:  
1250 Distribution of preferred directions. *Science* **155**, 841–842.  
1251
- 1252 Rivlin-Etzion M., Zhou K., Wei W., Elstrott J., Nguyen P.L., Barres B.A., Huberman A.D.,  
1253 and Feller M.B. (2011). Transgenic mice reveal unexpected diversity of On-Off  
1254 direction-selective retinal ganglion cell subtypes and brain structures involved in motion  
1255 processing. *J Neurosci.* **31**, 8760–8769.  
1256
- 1257 Rousso, D.L.L., Qiao, M., Kagan, R.D.D., Yamagata, M., Palmiter, R.D.D., and Sanes,  
1258 J.R.R. (2016). Two pairs of ON and OFF retinal ganglion cells are defined by  
1259 intersectional patterns of transcription factor expression. *Cell Rep.* **15**, 1930–1944.  
1260
- 1261 Sabbah, S., Gemmer, J.A., Bhatia-Lin, A., Manoff, G., Castro, G., Siegel, J.K., Jeffery,  
1262 N., and Berson, D.M. (2017). A retinal code for motion along the gravitational and body  
1263 axes. *Nature* **546**, 492–497.  
1264
- 1265 Sanes, J.R. and Masland R.H. (2015). The types of retinal ganglion cells: current  
1266 Status and implications for neuronal classification. *Ann. Rev. Neurosci.* **38**, 221–246.  
1267
- 1268 Schwartz, G., Taylor, S., Fisher, C., Harris, R., and Berry, M.J., II (2007). Synchronized  
1269 firing among retinal ganglion cells signals motion reversal. *Neuron* **55**, 958–969.  
1270
- 1271 Sethuramanujam, S., McLaughlin, A.J., deRosenroll, G., Hoggarth, A., Schwab, D.J.,  
1272 and Awatramani, G.B. (2016). A central role for mixed acetylcholine/GABA transmission  
1273 in direction coding in the retina. *Neuron* **90**, 1243–1256.  
1274
- 1275 Simpson, JI., Leonard, C.S., and Soodak, R.E. (1984). The accessory optic system.  
1276 *Ann. Rev. Neurosci.* **7**, 13-41.  
1277
- 1278 Sivyer, B., van Wyk, M., Vaney, D.I., and Taylor, W.R. (2010). Synaptic inputs and  
1279 timing underlying the velocity tuning of direction-selective ganglion cells in rabbit retina.  
1280 *J. Physiol.* **588**, 3243–3253.  
1281
- 1282 Shang, C., Liu, L., Chen, Z., Shi, Y., Wang, Q., Liu, S., Li, D., and Cao, P. (2015). A  
1283 parvalbumin-positive excitatory visual pathway to trigger fear responses in mice.  
1284 *Science* **348**, 1472–1477.  
1285
- 1286 Shi, X., Barchini, J., Ledesma, H.A., Koren, D., Jin, Y., Liu, X., Wei, W., and Cang, J.  
1287 (2017). Retinal origin of direction selectivity in the superior colliculus. *Nat. Neurosci.* **20**,  
1288 550–558.

- 1289 Spruston, N. (2008). Pyramidal neurons: dendritic structure and synaptic integration.  
1290 *Nat. Neurosci. Reviews* **9**, 206–221.  
1291
- 1292 Takeshita, D., and Gollisch, T. (2014). Nonlinear spatial integration in the receptive field  
1293 surround of retinal ganglion cells. *J. Neurosci.* **34**, 7548–7561.  
1294
- 1295 Taylor, W.R., and Vaney, D.I. (2002). Diverse synaptic mechanisms generate direction  
1296 selectivity in the rabbit retina. *J. Neurosci.* **22**, 7712–7720.  
1297
- 1298 Trenholm, S., Johnson, K., Li, X., Smith, R.G., and Awatramani, G.B. (2011). Parallel  
1299 mechanisms encode direction in the retina. *Neuron* **71**, 683–694.  
1300
- 1301 Turner, M.H., Schwartz, G.W., and Rieke, F. (2018). Receptive field center-surround  
1302 interactions mediate context-dependent spatial contrast encoding in the retina. *Elife* **7**,  
1303 e38841.  
1304
- 1305 Wei, W., Hamby, A.M., Zhou, K., and Feller, M.B. (2011). Development of asymmetric  
1306 inhibition underlying direction selectivity in the retina. *Nature* **469**, 402–406.  
1307
- 1308 Wyatt, H.J., and Daw, N.W. (1975). Directionally sensitive ganglion cells in the rabbit  
1309 retina: specificity for stimulus direction, size and speed. *J. Neurophysiol.* **38**, 613–626.  
1310
- 1311 Yonehara, K., Balint, K., Noda, M., Nagel, G., Bamberg, E., and Roska, B. (2011).  
1312 Spatially asymmetric reorganization of inhibition establishes a motion-sensitive circuit.  
1313 *Nature* **469**, 407–410.  
1314
- 1315 Zhang, Y., Kim, I.J., Sanes, J.R., and Meister, M. (2012). The most numerous ganglion  
1316 cell type of the mouse retina is a selective feature detector. *Proc. Natl. Acad. Sci. U. S.*  
1317 *A.* **109**, E2391–E21398.  
1318
- 1319 Zylberberg, J., Cafaro, J., Turner, M.H., Shea-Brown, E., and Rieke, F. (2016).  
1320 Direction-selective circuits shape noise to ensure a precise population code. *Neuron* **89**,  
1321 369–383.  
1322
