# Supplementary material for: Spatially displaced excitation contributes to the encoding of interrupted motion by the retinal direction-selective circuit
Source: bioRxiv or medRxiv preprint supplement (doi:10.1101/2020.05.29.124461), 2021-02-19
Supplement: Supplementary file [file media-1.pdf]

12 and peak amplitude in control condition (15 cells) and DH $\beta$ E + Gabazine (24 cells) conditions (charge  
13 transfer, \*p = 0.02). **(E)** Left: Latency of On EPSC response in control condition and DH $\beta$ E + Gabazine  
14 conditions (p = 0.15). Middle: Same as **left**, but for rise time (10% - 90%) (\*\*p < 0.001). Right: Same  
15 as **left** but for decay time (90% - 10%) (\*\*p < 0.001). **(F)** Top left: Pairwise comparison of Off charge  
16 transfer responses in the Max and Opp regions and the polar histograms of Max regions aligned to  
17 the preferred-null motion axis in the control condition. Radius indicates number of cells. Bottom left:  
18 Pairwise comparison of Off amplitude responses in the Max and Opp regions and the polar histograms  
19 of Max regions aligned to the preferred-null motion axis in the control condition. Top right: Same as  
20 top left, but in DH $\beta$ E + Gabazine. Bottom right: Same as bottom left, but in DH $\beta$ E + Gabazine.  
21 Summary statistics are mean  $\pm$  SEM, \*\*p < 0.001 except where specified otherwise. **(G)** Same as **D**  
22 but for Off EPSCs (amplitude \*p = 0.014, charge transfer p = 0.069). **(H)** Left: Spiking receptive field  
23 color map to 60  $\mu$ m flashing spots. White circle represents soma. Green circle represents average  
24 pDSGC dendritic span. Right: Pairwise comparison of the distance to the receptive field boundary on  
25 the preferred and null sides (13 cells, \*\*p < 0.001).

26  
27  
28  
29  
30  
31  
32  
33  
34  
35  
36  
37  
38  
39  
40  
41  
42  
43  
44  
45  
46  
47  
48  
49  
50  
51  
52  
53  
54  
55  
56  
57  
58  
59  
60  
61  
62  
63  
64  
65

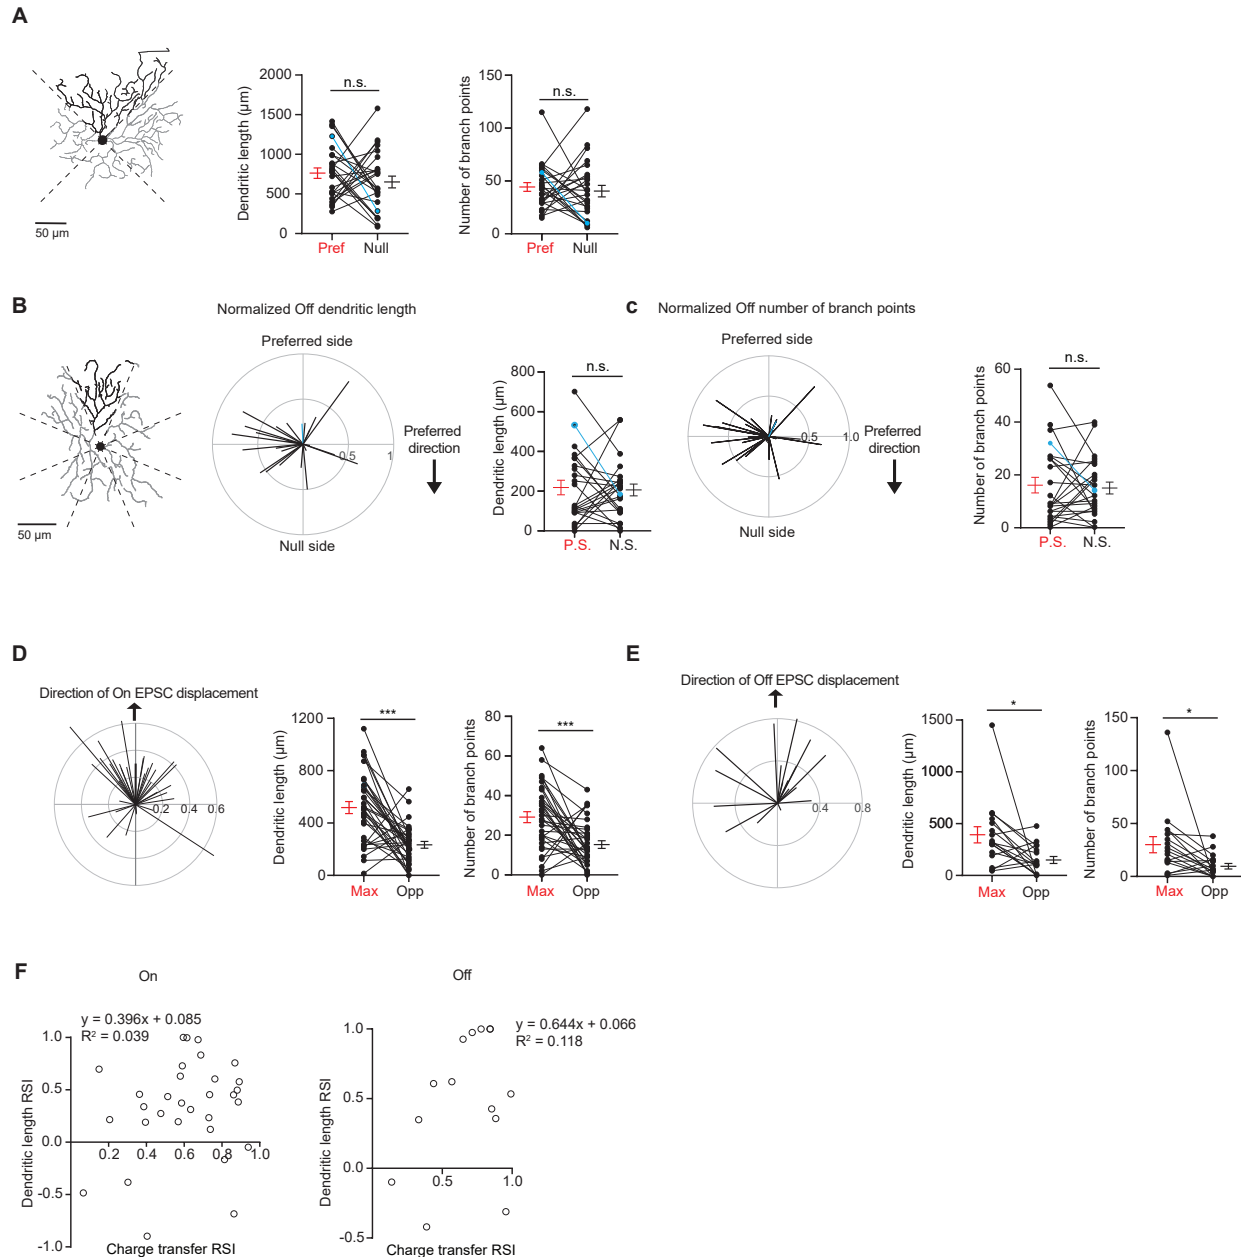

66  
67

68 **Supplemental Figure 2. Dendritic morphology shows spatial bias along glutamatergic**  
69 **receptive field.**

70 **(A)** Left: Example morphology of a pDSGC On layer divided into quadrants. Middle: Pairwise  
71 comparison of dendritic length on the preferred vs null sides of each cell (26 cells,  $p = 0.33$ ). Right:  
72 Total number of branch points on the preferred vs null sides of each cell (26 cells,  $p = 0.25$ ).  
73 Example cell in blue. **(B)** Left: Example morphology of pDSGC Off layer divided into eighths.  
74 Middle: Normalized vector sum of Off dendritic length aligned to pDSGCs' preferred direction  
75 motion. Right: Pairwise comparison of Off dendritic length on the preferred vs null sides of each  
76 cell (24 cells,  $p = 0.78$ ). **(C)** Same as **B** but for number of Off branch points (24 cells,  $p = 0.73$ ).  
77 **(D)** Left: Normalized vector sum plot of On dendritic length in eight sectors aligned to the region  
78 evoking maximal glutamatergic EPSC (upward arrow). Middle: Total dendritic length in the region  
79 evoking maximal glutamatergic EPSC as determined by peripheral spot stimulus (Max) and  
80 opposite region (Opp) (31 cells,  $***p < 0.001$ ). Right: Total number of branch points in the Max  
81 and Opp regions (31 cells,  $***p < 0.001$ ). **(E)** Same as in **D**, but for Off layer (17 cells, dendritic

82 length \*p = 0.018, branch points \*p = 0.027). **(F)** Left: On dendritic length RSI versus On EPSC  
83 charge transfer RSI (31 cells). RSI is based on regions evoking maximal glutamatergic charge  
84 transfer responses and opposite regions. Right: Same as left, but for Off dendrites and  
85 EPSCs (14 cells). Summary statistics are mean  $\pm$  SEM.

86  
87  
88  
89  
90  
91  
92  
93  
94  
95  
96  
97  
98  
99  
100  
101  
102  
103  
104  
105  
106  
107  
108  
109  
110  
111  
112  
113  
114  
115  
116  
117  
118  
119  
120  
121  
122  
123  
124  
125  
126  
127  
128

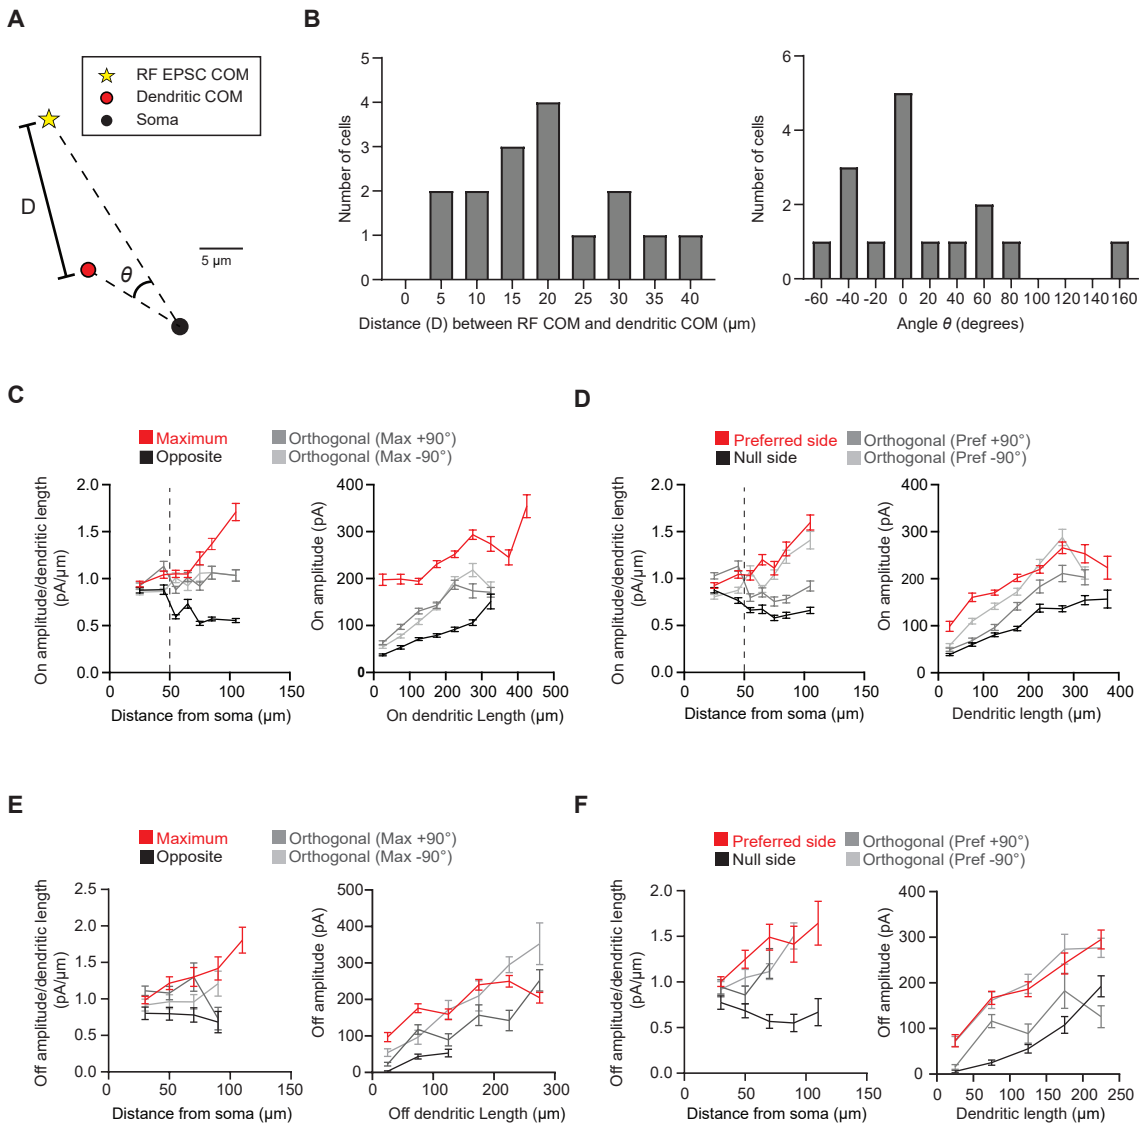

129  
 130  
 131  
 132  
 133  
 134  
 135  
 136  
 137  
 138  
 139  
 140  
 141  
 142  
 143  
 144  
 145  
 146

**Supplemental Figure 3. pDSGC glutamatergic synaptic excitation is displaced relative to the dendritic field.**

(A) The dendritic center of mass (red circle) and the RF EPSC charge transfer center of mass (yellow circle) of an example pDSGC. (B) Left: Histogram of the distance (D) between the dendritic center of mass and the EPSC charge transfer center of mass of each pDSGC. Right: Histogram of the angle difference ( $\theta$ ) between the EPSC charge transfer center of mass and the dendritic center of mass). D and  $\theta$  values are illustrated in A. (C) Left: Ratio of amplitude per dendritic length versus distance from soma in the region evoking the maximum glutamatergic EPSC response (Maximum) and the opposite region (Opposite) (left, 16 cells,  $***p < 0.001$ ) as well as the orthogonal regions. Right: Quantification of amplitude per dendritic length in those regions for spots presented at least 50  $\mu\text{m}$  away from the soma (right, 16 cells,  $***p < 0.001$ ). (D) Same as C but for the preferred-null motion axis. (Amplitude/dendritic length vs distance  $**p = 0.001$ , amplitude vs dendritic length  $***p < 0.001$ ). (E) Same as C except for Off dendrites and EPSCs (9 cells, right and left  $***p < 0.001$ ). (F) Same as D but for Off dendrites and EPSCs (9 cells, right and left  $***p < 0.001$ ). Summary statistics are mean  $\pm$  SEM.

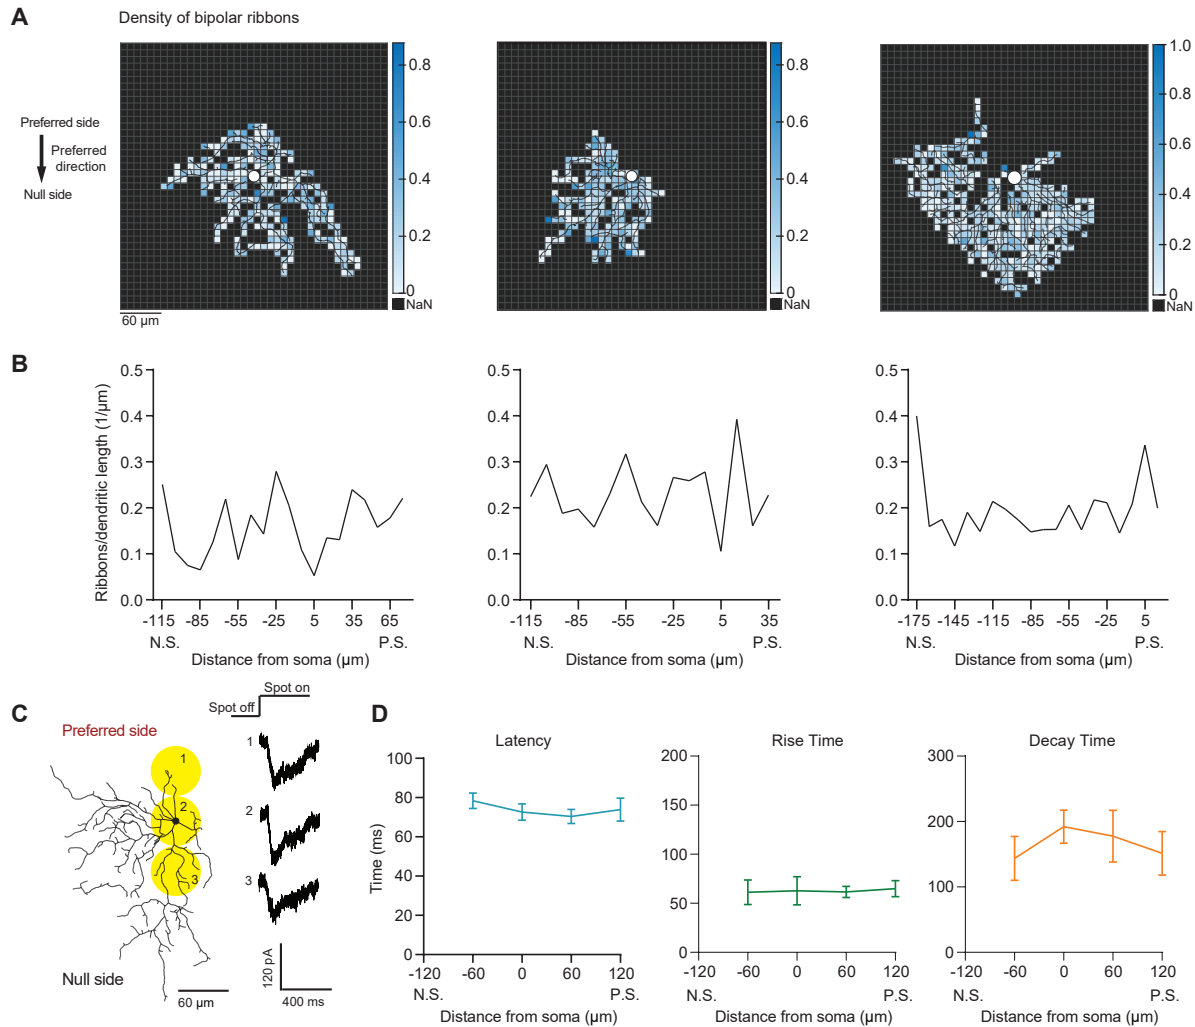

147  
 148  
 149  
 150  
 151  
 152  
 153  
 154  
 155  
 156  
 157  
 158  
 159  
 160  
 161  
 162  
 163  
 164  
 165

**Supplemental Figure 4. Bipolar ribbon density does not consistently change across the preferred-null motion axis.**

(A) Density map of bipolar ribbon synapses for 3 example cells based on the published connectomic dataset (Ding et al., 2016). Each square is 10 x 10 μm. (B) Quantification of ribbon density across the preferred-null motion axis. The soma location is at 0. (N.S. = null side, P.S. = preferred side). (C) Example glutamatergic EPSC responses to spots presented on the preferred and null sides of a pDSGC in DHβE. (D) Summary plots of latency (p = 0.12), rise time (10% - 90%; p = 0.85), and decay time (90% - 30%; p = 0.93) of glutamatergic EPSC responses along the preferred-null motion axis (N.S. = null side, P.S. = preferred side)(9 cells). Summary statistics are mean ± SEM.

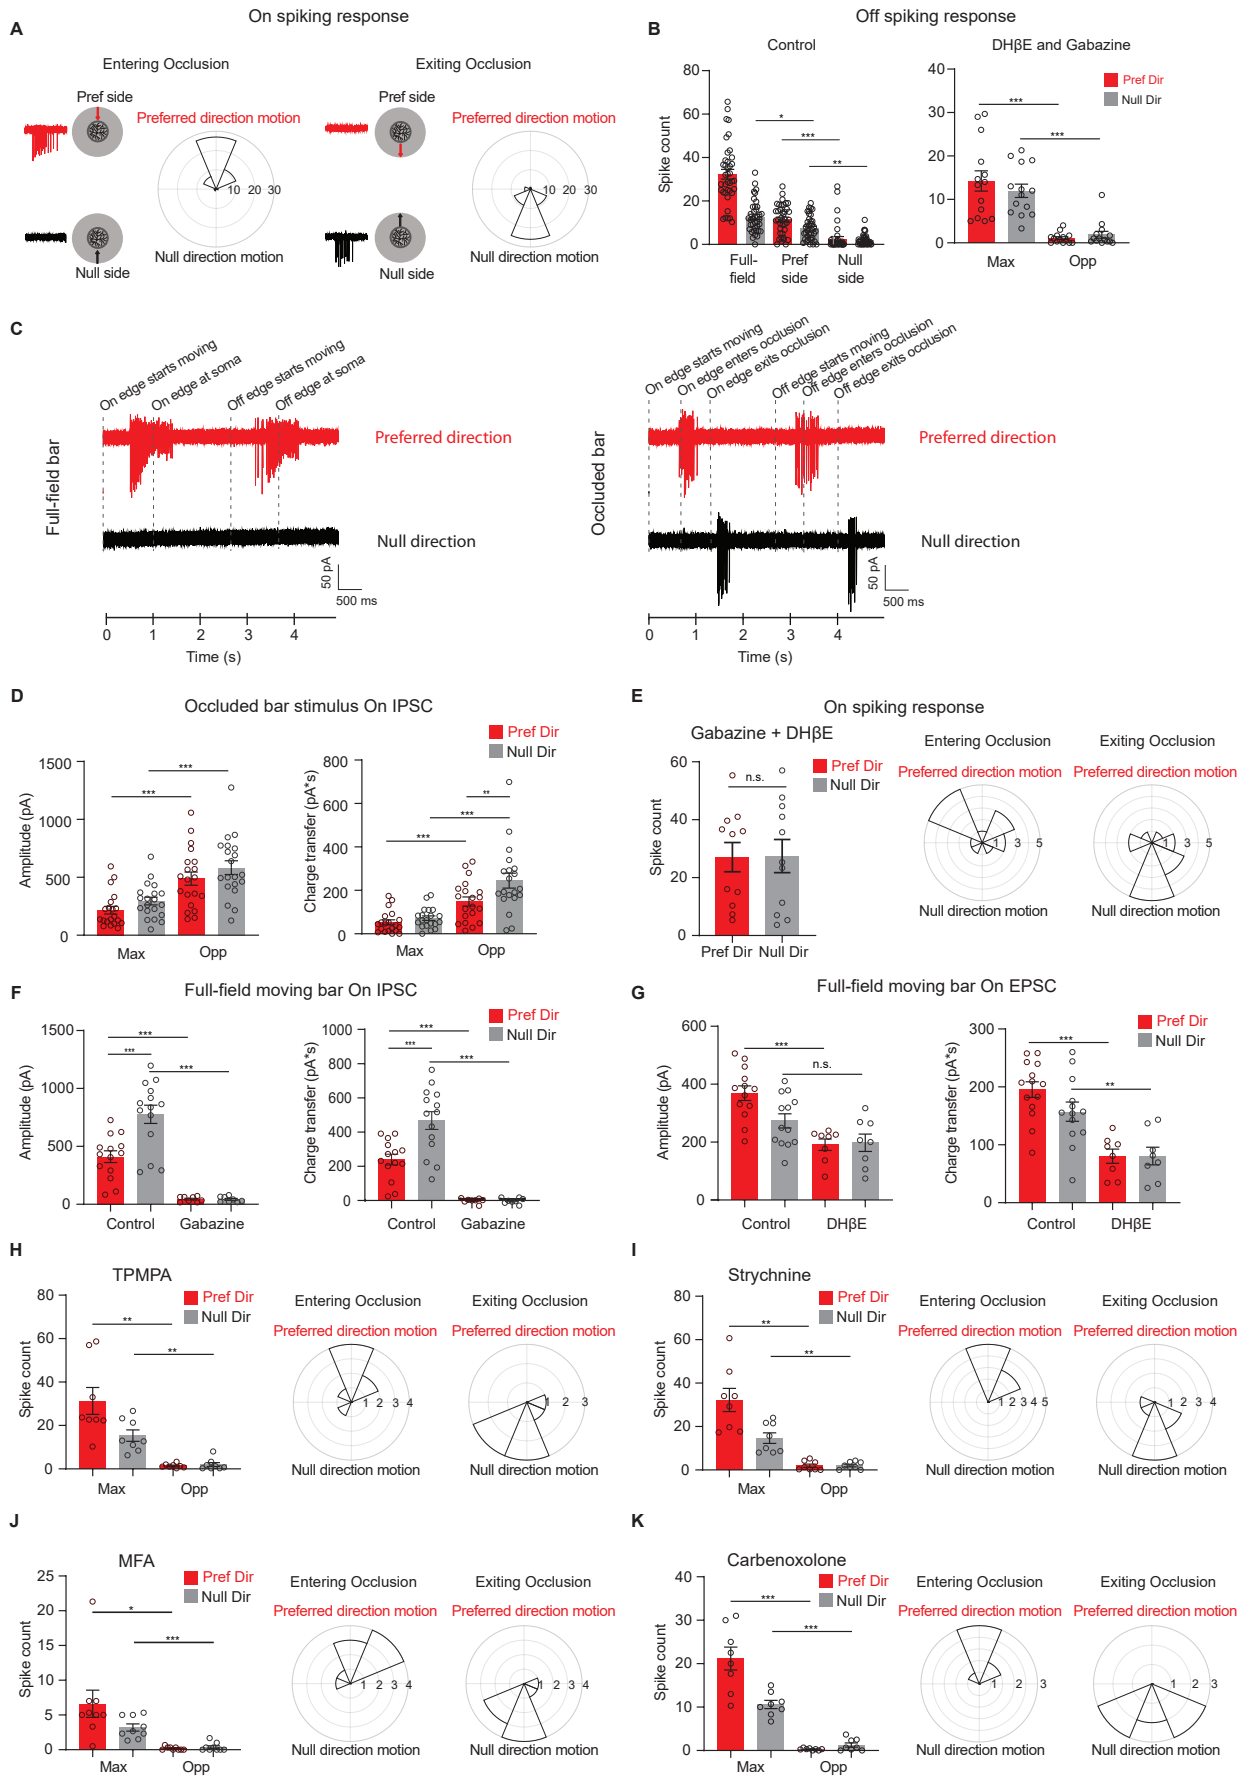

167 **Supplemental Figure 5. Displaced glutamatergic excitation contributes to null-direction**  
168 **responses in the preferred region.**

169 **(A)** Polar histograms of spiking vector sum locations when the bar enters the occlusion (left)  
170 versus when the bar exits the occlusion (right). Radius indicates number of cells. (48 cells).  
171 Responses are aligned to the preferred direction, which points to the top. **(B)** Left: Mean Off spike  
172 counts of pDSGCs to the full-field moving bar and the occluded moving bar stimulus on the  
173 preferred side and null side (39 cells, Full-field null dir. vs preferred side null dir.  $**p = 0.01$ ,  
174 preferred side null. dir. vs null side null. dir.  $**p = 0.005$ ). Right: Mean Off spike counts in DH $\beta$ E  
175 + Gabazine to the occluded bar stimulus in the region evoking the maximum spiking (Max) and  
176 the opposite region (Opp) (14 cells). **(C)** Left: Example spiking traces to the full-field moving bar.  
177 Right: Example spiking traces to the occluded bar stimulus. **(D)** Mean On IPSC peak amplitude  
178 (left) and charge transfer (right) to the occluded bar in the region evoking the maximum EPSC  
179 response (Max) and the opposite region (Opp) (20 cells). **(E)** Left: Mean spike counts to the full-  
180 field moving bar in DH $\beta$ E + Gabazine (11 cells,  $p = 0.84$ ). Middle and Right: Polar histograms of  
181 spiking vector sum locations when the bar enters the occluder and exits the occluder. Radius  
182 indicates number of cells. (14 cells). **(F)** Mean On IPSC peak amplitude (left) and charge transfer  
183 (right) to a full-field bar in the Control (14 cells) and Gabazine conditions (8 cells). **(G)** Mean On  
184 EPSC peak amplitude (left) and charge transfer (right) to a full-field bar in the Control (13 cells)  
185 and DH $\beta$ E conditions (8 cells). For amplitude: Control null dir. vs DH $\beta$ E null dir.  $p = 0.099$ . For  
186 charge transfer: Control null dir. vs DH $\beta$ E null dir.  $**p = 0.003$ . **(H)** Left: Mean spike counts to  
187 the bar entering and exiting the occluder in TPMPA (right, 8 cells, Pref Dir – Max vs Pref Dir –  
188 Opp  $**p = 0.0037$ . Null Dir – Max vs Null Dir – Opp  $**p = 0.0022$ ). Middle and Right: Polar  
189 histograms of spiking vector sum locations when the bar enters the occluder and exits the  
190 occluder in TPMPA Radius indicates number of cells. (8 cells). **(I)** As in **H**, but in strychnine (8  
191 cells, Pref Dir – Max vs Pref Dir – Opp  $**p = 0.0012$ . Null Dir – Max vs Null Dir – Opp  $**p = 0.0017$ ).  
192 **(J)** As in **H**, but in MFA (9 cells, Pref Dir – Max vs Pref Dir – Opp  $*p = 0.021$ ). **(K)** As in **H**, but in  
193 Carbenoxolone (8 cells). Summary statistics are mean  $\pm$  SEM,  $***p < 0.001$  except where  
194 specified otherwise.

195  
196  
197  
198  
199  
200  
201  
202  
203  
204  
205  
206  
207  
208  
209  
210  
211  
212  
213



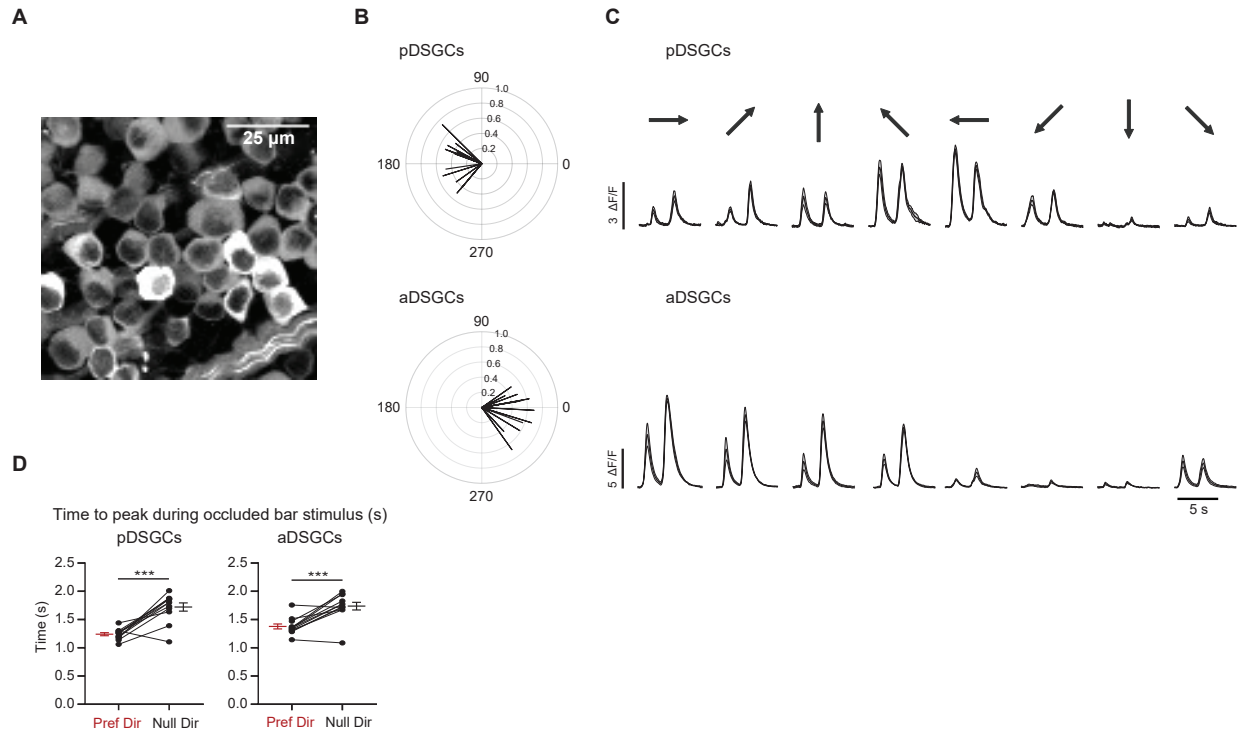

214  
 215  
 216  
 217  
 218  
 219  
 220  
 221  
 222  
 223  
 224  
 225  
 226  
 227  
 228  
 229  
 230  
 231  
 232  
 233  
 234  
 235  
 236  
 237  
 238  
 239  
 240

**Supplemental Figure 6. Calcium imaging of anterior and posterior-preferring On-Off DSGCs.**

**(A)** Z-stack standard deviation projection of GCaMP6f-expressing cells in the ganglion cell layer. **(B)** Top: Vector sum plot of peak calcium signal amplitudes of pDSGCs. Bottom: Vector sum plot of peak amplitudes of aDSGCs. **(C)** Example calcium traces of a pDSGC (top) and an aDSGC (bottom) to full-field moving bar in eight directions. **(D)** Left: Preferred direction time to peak vs null direction time to peak during the occluded bar stimulus for pDSGCs (12 cells,  $***p < 0.001$ ). Right: Same as top but for aDSGCs (12 cells,  $***p < 0.001$ ). Summary statistics are mean  $\pm$  SEM.

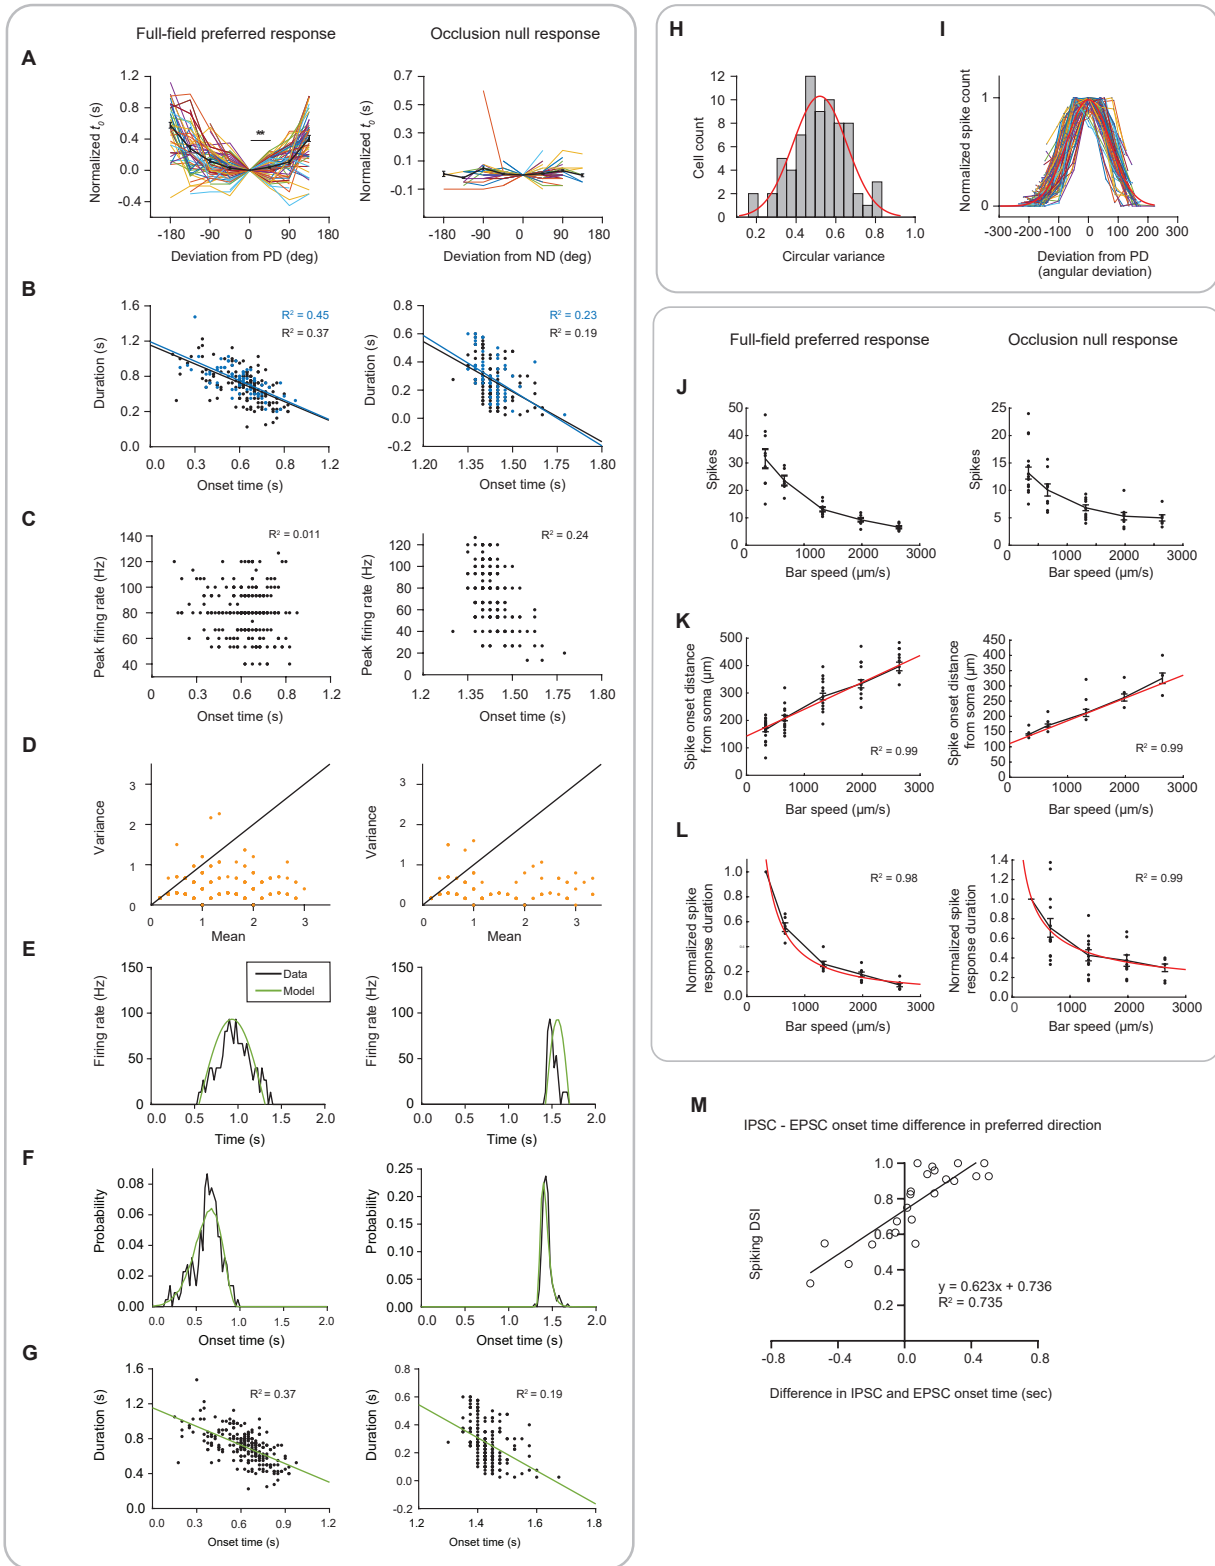

241  
242  
243  
244  
245  
246

**Supplemental Figure 7. Model fits to experimental recordings.**

(A) Experimentally measured, normalized onset times,  $t_0$ , as a function of motion direction, with the average shown in bold and black (left: full-field, 73 cells; right: occlusion, 69 cells). Onset times were aligned to the time when the bar moved in the cell's preferred direction (full-field

247 preferred response 0 vs 45:  $**p = 0.004$ ). **(B)** Linear correlation between spike response  
248 duration and spike response onset time. Data points are trials in which the bar moved in the  
249 preferred (left, full-field response) or null (right, occlusion response) direction (blue) or  $\pm 45$   
250 degrees around the preferred or null direction (black). Left: full-field (black slope = -0.71; blue  
251 slope = -0.73). Right: occlusion (black slope = -1.18; blue slope = -1.31). **(C)** Scatter plots of  
252 peak firing rate versus onset time. Left: full-field; right: occlusion. **(D)** Scatter plots of spike count  
253 mean and variance (left: full-field, 10 cells; right: occlusion, 9 cells). The unity line is plotted. The  
254 spiking is significantly sub-Poisson. **(E)** Example half sine wave fits (green) to PSTHs obtained  
255 from experimental data (left: full-field, 73 cells; right: occlusion, 69 cells). **(F)** Fits to probability  
256 distributions of spike response onset times. **(G)** Linear correlation between spike response  
257 duration and spike response onset time. **(H)** Distribution of tuning curve widths fit to Gaussian.  
258 **(I)** Motion direction tuning curves of all cells normalized by their peaks and widths and their  
259 average (bold, red). Summary statistics are mean  $\pm$  SEM. **(J)** Spiking response across speeds  
260 to the full-field preferred response (right, 10 cells) and the occlusion null response (left, 17  
261 cells). **(K)** Same as **J** but for the spike onset distance from soma. **(L)** Same as **J** but for the  
262 normalized spike response duration. **(M)** The onset time difference between the IPSC and  
263 EPSC to a full-field bar in the preferred direction versus direction selectivity.

264

265
